# Supplementary material for: Intrusive Seismic Swarms as Possible Precursors of Destructive Earthquakes on Mt. Etna’s Eastern Flank
Source: Hindawi journal article supplement (doi:10.1155/2022/8565536), 2022-02-07
Supplement: f1 [file 8565536.f1.pdf]

Location parameters of 636 of 813 events recored between 16 and 31 october 1984

| DATE HHMMSEC        | Latitude | Longitude | Depth | ML  | Picking | GAP | RMS  | ERH (Km) | ERZ (Km) |
|---------------------|----------|-----------|-------|-----|---------|-----|------|----------|----------|
| 1984/10/16 13:49:41 | 37.7803  | 15.0515   | 2.9   | 2.2 | 5       | 111 | 0.26 | 1.2      | 2.3      |
| 1984/10/16 14:20:01 | 37.7655  | 15.0020   | 0.6   | 2.3 | 5       | 173 | 0.16 | 1.9      | 1.8      |
| 1984/10/16 14:23:22 | 37.6473  | 15.1092   | 22.6  | 1.9 | 6       | 291 | 0.14 | 14.2     | 11.5     |
| 1984/10/16 15:08:03 | 37.7292  | 15.0192   | 9.0   | 1.8 | 6       | 112 | 0.12 | 1.3      | 2.1      |
| 1984/10/16 15:10:39 | 37.7360  | 15.0627   | 10.0  | 2.1 | 7       | 94  | 0.24 | 2.2      | 4        |
| 1984/10/16 15:14:19 | 37.8110  | 15.0247   | 0.1   | 2.2 | 5       | 131 | 0.24 | 2.7      | 2.6      |
| 1984/10/16 15:17:20 | 37.7820  | 14.9897   | 4.6   | 2.7 | 7       | 113 | 0.36 | 2.5      | 12.5     |
| 1984/10/16 15:34:02 | 37.7935  | 15.0135   | 0.2   | 2.5 | 5       | 134 | 0.67 | 7.5      | 7.6      |
| 1984/10/16 15:35:25 | 37.7832  | 14.9922   | 3.6   | 2.1 | 7       | 121 | 0.4  | 2.6      | 603.7    |
| 1984/10/16 15:42:37 | 37.7232  | 15.0083   | 14.7  | 2.2 | 5       | 146 | 0.69 | 21.6     | 38.6     |
| 1984/10/16 15:42:56 | 37.7852  | 15.0495   | 0.9   | 2.1 | 5       | 183 | 0.04 | 0.5      | 0.4      |
| 1984/10/16 15:54:43 | 37.7708  | 14.9717   | 9.0   | 2.1 | 6       | 125 | 0.29 | 3.3      | 11.8     |
| 1984/10/16 16:11:39 | 37.7612  | 15.0218   | 7.2   | 2.2 | 9       | 96  | 0.2  | 1.1      | 2.4      |
| 1984/10/16 16:13:36 | 37.7677  | 14.9882   | 3.2   | 2.1 | 9       | 112 | 0.26 | 1.3      | 1.8      |
| 1984/10/16 16:19:34 | 37.6595  | 14.9127   | 0.7   | 2.2 | 6       | 294 | 0.84 | 48.6     | 19.5     |
| 1984/10/16 16:22:54 | 37.7925  | 15.0370   | 3.6   | 2.2 | 5       | 118 | 0.33 | 3.4      | 731.1    |
| 1984/10/16 16:29:23 | 37.7720  | 15.0217   | 2.0   | 2.4 | 11      | 60  | 0.32 | 1.2      | 0.8      |
| 1984/10/16 16:30:23 | 37.7608  | 15.0045   | 11.1  | 2   | 6       | 198 | 0.3  | 4.5      | 7.9      |
| 1984/10/16 16:41:48 | 37.7623  | 15.0258   | 2.3   | 1.9 | 9       | 76  | 0.33 | 1.3      | 0.8      |
| 1984/10/16 16:52:36 | 37.7577  | 15.0578   | 1.4   | 2.1 | 8       | 68  | 0.45 | 1.9      | 1.3      |
| 1984/10/16 17:01:16 | 37.7537  | 15.0253   | 3.6   | 2.2 | 10      | 68  | 0.42 | 1.8      | 17.5     |
| 1984/10/16 17:10:16 | 37.7717  | 15.0375   | 0.2   | 2.4 | 5       | 104 | 0.34 | 3.6      | 3.8      |
| 1984/10/16 17:28:19 | 37.7322  | 14.9658   | 21.7  | 2.4 | 5       | 150 | 0.34 | 19.2     | 41.9     |
| 1984/10/16 17:32:19 | 37.7667  | 14.9715   | 5.9   | 2.4 | 5       | 127 | 0.83 | 18.1     | 107.5    |
| 1984/10/16 17:36:00 | 37.7545  | 15.0123   | 0.9   | 2.1 | 5       | 95  | 0.68 | 7.5      | 8.4      |
| 1984/10/16 17:38:37 | 37.7698  | 15.0113   | 0.4   | 2.3 | 5       | 163 | 0.22 | 1.2      | 1        |
| 1984/10/16 17:51:31 | 37.8118  | 15.0208   | 3.6   | 2.2 | 5       | 133 | 0.75 | 8.1      | 999.9    |
| 1984/10/16 17:53:16 | 37.7768  | 15.0252   | 0.2   | 2.9 | 6       | 105 | 0.38 | 2.8      | 2.7      |
| 1984/10/16 17:58:05 | 37.7622  | 15.0333   | 1.6   | 1.7 | 8       | 107 | 0.36 | 1.5      | 0.9      |
| 1984/10/16 18:00:23 | 37.7910  | 14.9480   | 10.9  | 2.5 | 5       | 147 | 0    | 0.1      | 0.2      |
| 1984/10/16 18:03:32 | 37.7857  | 14.9162   | 6.1   | 2.3 | 5       | 162 | 0.13 | 3.2      | 10       |
| 1984/10/16 18:17:28 | 37.7555  | 15.0292   | 13.4  | 2.6 | 6       | 104 | 0.2  | 2.7      | 6.3      |
| 1984/10/16 18:19:23 | 37.7797  | 15.0370   | 0.5   | 1.7 | 8       | 105 | 0.49 | 2.5      | 1.8      |
| 1984/10/16 18:24:42 | 37.7985  | 15.0478   | 0.7   | 2.4 | 5       | 130 | 0.28 | 7.3      | 9.2      |
| 1984/10/16 18:25:34 | 37.8098  | 15.0757   | 1.0   | 2.5 | 5       | 151 | 0.39 | 0        | 0        |
| 1984/10/16 18:30:01 | 37.7758  | 15.0477   | 10.2  | 2.6 | 6       | 111 | 0.64 | 6.4      | 21.3     |
| 1984/10/16 18:32:01 | 37.7683  | 15.0220   | 4.6   | 2.1 | 6       | 100 | 0.06 | 0.5      | 1.5      |
| 1984/10/16 20:20:01 | 37.7458  | 14.9935   | 14.6  | 2.7 | 5       | 159 | 0.08 | 1.1      | 2.1      |
| 1984/10/16 20:35:35 | 37.7998  | 15.0532   | 3.6   | 2.6 | 5       | 114 | 0.26 | 2.6      | 574.4    |
| 1984/10/16 20:36:57 | 37.8072  | 14.9960   | 18.5  | 2.3 | 5       | 216 | 0.63 | 20       | 64.8     |
| 1984/10/16 20:53:25 | 37.7762  | 15.0002   | 33.0  | 2   | 5       | 108 | 0.72 | 33       | 211.4    |
| 1984/10/16 21:04:01 | 37.7910  | 14.9850   | 5.0   | 2.1 | 5       | 120 | 0.78 | 12       | 216      |
| 1984/10/16 21:10:50 | 37.7527  | 15.0292   | 0.9   | 1.6 | 7       | 96  | 0.14 | 0.8      | 0.8      |
| 1984/10/16 21:57:31 | 37.8465  | 15.0967   | 5.0   | 2.3 | 5       | 139 | 0.87 | 15.7     | 55       |
| 1984/10/16 22:20:35 | 37.7865  | 15.0680   | 23.4  | 2.3 | 5       | 92  | 0.11 | 2.8      | 10.9     |
| 1984/10/16 22:37:48 | 37.7817  | 15.0653   | 2.4   | 2   | 5       | 99  | 0.5  | 5.1      | 3.1      |
| 1984/10/16 23:15:38 | 37.7487  | 14.9643   | 6.4   | 2.5 | 7       | 143 | 0.24 | 3.4      | 11.7     |

|                     |         |         |      |     |    |     |      |      |       |
|---------------------|---------|---------|------|-----|----|-----|------|------|-------|
| 1984/10/16 23:36:27 | 37.7412 | 15.0082 | 1.3  | 2.2 | 7  | 97  | 0.2  | 1.1  | 0.8   |
| 1984/10/16 23:51:42 | 37.7665 | 14.9588 | 0.9  | 2.2 | 5  | 260 | 0.3  | 9.8  | 4.2   |
| 1984/10/17 00:20:32 | 37.7988 | 15.0433 | 1.2  | 2.2 | 6  | 77  | 0.25 | 0.8  | 0.8   |
| 1984/10/17 00:46:53 | 37.7877 | 15.0282 | 0.7  | 2.7 | 7  | 81  | 0.06 | 0.4  | 0.3   |
| 1984/10/17 03:33:45 | 37.7585 | 15.0032 | 1.2  | 2.1 | 5  | 173 | 0.19 | 2.2  | 1.9   |
| 1984/10/17 03:47:39 | 37.7057 | 15.0347 | 20.7 | 2.2 | 6  | 168 | 0.39 | 19.3 | 27.2  |
| 1984/10/17 04:14:42 | 37.7517 | 15.0095 | 3.6  | 2.1 | 9  | 114 | 0.31 | 1.6  | 3.7   |
| 1984/10/17 08:55:15 | 37.7607 | 15.0277 | 0.3  | 2.8 | 5  | 97  | 0.25 | 2.7  | 2.9   |
| 1984/10/17 09:04:16 | 37.5837 | 14.9788 | 13.7 | 2.3 | 5  | 214 | 0.58 | 13.7 | 6.1   |
| 1984/10/17 09:17:36 | 37.7812 | 15.0495 | 1.0  | 2.5 | 5  | 112 | 0.01 | 0.1  | 15    |
| 1984/10/17 09:45:48 | 37.7712 | 15.0017 | 0.4  | 2.6 | 5  | 104 | 0.07 | 0.8  | 0.9   |
| 1984/10/17 10:21:19 | 37.8173 | 15.0923 | 0.1  | 2.7 | 5  | 251 | 0.23 | 7.6  | 512.8 |
| 1984/10/17 10:26:08 | 37.6392 | 15.0430 | 9.6  | 2.7 | 5  | 207 | 0.54 | 1.7  | 4.1   |
| 1984/10/17 10:28:27 | 37.7450 | 15.0485 | 0.2  | 2.5 | 6  | 105 | 0.19 | 1.4  | 1.4   |
| 1984/10/17 10:42:20 | 37.7070 | 15.0177 | 14.4 | 2.6 | 6  | 148 | 0.16 | 1.9  | 3.5   |
| 1984/10/17 11:45:13 | 37.7410 | 15.0250 | 3.2  | 1.8 | 6  | 114 | 0.16 | 1.1  | 1     |
| 1984/10/17 12:04:34 | 37.7337 | 15.0313 | 2.3  | 1.9 | 7  | 132 | 0.3  | 1.8  | 1.1   |
| 1984/10/17 12:31:32 | 37.7823 | 15.0195 | 0.0  | 2.5 | 7  | 89  | 0.15 | 0.9  | 1     |
| 1984/10/17 12:41:49 | 37.7497 | 15.0565 | 8.0  | 2.7 | 5  | 168 | 0.17 | 3.7  | 5.4   |
| 1984/10/17 13:06:47 | 37.8720 | 15.0727 | 5.0  | 2.8 | 5  | 152 | 0.32 | 5.5  | 17.8  |
| 1984/10/17 13:06:56 | 37.7505 | 15.0443 | 0.0  | 2.3 | 5  | 200 | 0.13 | 0.3  | 0.2   |
| 1984/10/17 14:01:39 | 37.7420 | 15.0238 | 3.3  | 2.6 | 10 | 64  | 0.37 | 1.5  | 1.4   |
| 1984/10/17 14:23:59 | 37.7303 | 15.0605 | 3.7  | 1.9 | 6  | 186 | 0.2  | 2.1  | 43.1  |
| 1984/10/17 15:28:50 | 37.7393 | 15.0595 | 1.8  | 2.2 | 6  | 109 | 0.25 | 2    | 1.5   |
| 1984/10/17 15:31:47 | 37.7442 | 15.0303 | 2.4  | 2.3 | 8  | 98  | 0.2  | 1    | 0.6   |
| 1984/10/17 15:40:48 | 37.7460 | 14.9913 | 5.8  | 2   | 6  | 114 | 0.22 | 2.1  | 3.3   |
| 1984/10/17 15:54:22 | 37.7632 | 15.0480 | 0.3  | 1.7 | 5  | 173 | 0.46 | 5.8  | 6.7   |
| 1984/10/17 15:56:49 | 37.7390 | 15.0300 | 6.4  | 2.3 | 8  | 93  | 0.29 | 2    | 4.3   |
| 1984/10/17 16:03:08 | 37.7817 | 15.0110 | 1.1  | 2.9 | 5  | 201 | 0.1  | 1.5  | 220.4 |
| 1984/10/17 16:06:52 | 37.7400 | 15.0258 | 6.1  | 1.6 | 6  | 84  | 0.11 | 1.1  | 3.1   |
| 1984/10/17 16:08:05 | 37.7487 | 15.0540 | 5.0  | 2.2 | 7  | 109 | 0.3  | 2.7  | 18.1  |
| 1984/10/17 16:10:24 | 37.6988 | 15.0873 | 7.4  | 2.3 | 5  | 163 | 0.26 | 28.2 | 64.8  |
| 1984/10/17 16:13:08 | 37.7362 | 15.0083 | 1.8  | 2.2 | 7  | 98  | 0.12 | 0.6  | 0.4   |
| 1984/10/17 16:18:28 | 37.7383 | 15.0200 | 7.0  | 2.9 | 7  | 102 | 0.12 | 0.9  | 2.4   |
| 1984/10/17 16:23:30 | 37.7303 | 15.0703 | 0.6  | 2.3 | 5  | 112 | 0.58 | 2.3  | 2.4   |
| 1984/10/17 16:26:06 | 37.7148 | 14.9547 | 1.4  | 1.9 | 6  | 185 | 0.17 | 1.3  | 0.7   |
| 1984/10/17 16:29:37 | 37.7415 | 15.0123 | 2.6  | 2.3 | 9  | 62  | 0.44 | 1.9  | 1     |
| 1984/10/17 16:30:32 | 37.7407 | 15.0240 | 2.6  | 1.7 | 9  | 65  | 0.46 | 2    | 1.3   |
| 1984/10/17 16:34:40 | 37.7087 | 14.9175 | 11.7 | 2.3 | 7  | 233 | 0.3  | 5.9  | 7     |
| 1984/10/17 16:36:21 | 37.8075 | 15.0393 | 0.2  | 2.2 | 6  | 128 | 0.68 | 5.6  | 5.4   |
| 1984/10/17 16:37:33 | 37.6837 | 15.0597 | 9.2  | 2.3 | 6  | 192 | 0.43 | 2.7  | 4.3   |
| 1984/10/17 16:37:48 | 37.7413 | 15.0073 | 6.4  | 2.5 | 6  | 110 | 0.29 | 3.2  | 5.1   |
| 1984/10/17 16:40:09 | 37.7238 | 14.9408 | 0.0  | 2.3 | 7  | 192 | 0.31 | 2.2  | 1.8   |
| 1984/10/17 16:41:29 | 37.7418 | 15.0148 | 10.7 | 2.5 | 6  | 96  | 0.26 | 3    | 7.2   |
| 1984/10/17 16:59:24 | 37.7260 | 15.0023 | 15.6 | 2.6 | 5  | 106 | 0.15 | 2.3  | 1.5   |
| 1984/10/17 17:23:11 | 37.7300 | 15.0087 | 9.6  | 2.4 | 5  | 105 | 0.23 | 2.9  | 5.9   |
| 1984/10/17 17:38:29 | 37.7727 | 14.8793 | 14.8 | 2.9 | 5  | 134 | 0.15 | 2.6  | 4.9   |
| 1984/10/17 17:47:02 | 37.7563 | 15.0348 | 0.1  | 2.3 | 5  | 100 | 0.18 | 0.7  | 0.7   |
| 1984/10/17 17:51:26 | 37.7202 | 15.0393 | 8.5  | 2.7 | 5  | 105 | 0.12 | 2.4  | 5.3   |
| 1984/10/17 17:55:02 | 37.7318 | 15.0032 | 8.9  | 2.7 | 8  | 81  | 0.26 | 1.8  | 3.4   |

|                     |         |         |      |     |    |     |      |     |       |
|---------------------|---------|---------|------|-----|----|-----|------|-----|-------|
| 1984/10/17 17:56:53 | 37.7520 | 15.0065 | 0.9  | 2.8 | 9  | 92  | 0.36 | 2   | 1.9   |
| 1984/10/17 17:58:12 | 37.6987 | 15.0437 | 14.9 | 2.5 | 7  | 148 | 0.26 | 3   | 5     |
| 1984/10/17 17:59:08 | 37.7218 | 15.0180 | 6.5  | 2.6 | 9  | 76  | 0.31 | 2   | 3.9   |
| 1984/10/17 18:00:37 | 37.7368 | 15.0170 | 6.9  | 2.6 | 8  | 83  | 0.5  | 4.8 | 14.5  |
| 1984/10/17 18:01:42 | 37.7197 | 15.0318 | 14.0 | 2.3 | 7  | 131 | 0.58 | 10  | 26.5  |
| 1984/10/17 18:02:09 | 37.7480 | 15.0290 | 1.2  | 2.8 | 9  | 64  | 0.47 | 2.3 | 2.2   |
| 1984/10/17 18:02:49 | 37.7545 | 15.0032 | 0.3  | 2.7 | 5  | 93  | 0.07 | 0.8 | 0.8   |
| 1984/10/17 18:04:48 | 37.7268 | 15.0200 | 6.9  | 2.4 | 8  | 81  | 0.22 | 1.7 | 3.8   |
| 1984/10/17 18:05:18 | 37.7648 | 15.0007 | 0.8  | 2.9 | 10 | 59  | 0.34 | 1.4 | 1.2   |
| 1984/10/17 18:06:56 | 37.7205 | 15.0202 | 0.2  | 2.6 | 6  | 125 | 0.61 | 2.1 | 1.7   |
| 1984/10/17 18:08:13 | 37.8825 | 14.9802 | 3.6  | 2.4 | 9  | 214 | 0.75 | 6.6 | 999.9 |
| 1984/10/17 18:08:47 | 37.7265 | 14.9898 | 2.1  | 2.6 | 11 | 93  | 0.5  | 1.8 | 0.8   |
| 1984/10/17 18:09:57 | 37.7792 | 14.9793 | 0.9  | 2.5 | 5  | 114 | 0.42 | 4.1 | 3.7   |
| 1984/10/17 18:11:16 | 37.7465 | 14.9987 | 2.6  | 2.6 | 9  | 68  | 0.3  | 1.3 | 0.7   |
| 1984/10/17 18:13:00 | 37.7437 | 14.9615 | 0.5  | 2.3 | 5  | 149 | 0.34 | 4.1 | 3.9   |
| 1984/10/17 18:15:15 | 37.7067 | 15.0432 | 10.9 | 2.7 | 8  | 147 | 0.33 | 2.7 | 4.7   |
| 1984/10/17 18:17:03 | 37.7385 | 14.9892 | 5.3  | 2   | 7  | 82  | 0.2  | 1.3 | 2     |
| 1984/10/17 18:19:06 | 37.7195 | 15.0235 | 1.1  | 2.3 | 6  | 128 | 0.05 | 0.3 | 0.2   |
| 1984/10/17 18:20:21 | 37.7413 | 15.0078 | 2.8  | 3.3 | 11 | 66  | 0.31 | 1.2 | 1.1   |
| 1984/10/17 18:21:57 | 37.7517 | 14.9973 | 15.7 | 2.1 | 5  | 92  | 0.01 | 0.2 | 0.1   |
| 1984/10/17 18:22:24 | 37.7358 | 14.9882 | 12.2 | 2.5 | 6  | 118 | 0.09 | 1.4 | 3.1   |
| 1984/10/17 18:24:46 | 37.7383 | 14.9935 | 1.3  | 2.7 | 7  | 86  | 0.48 | 2.5 | 1.9   |
| 1984/10/17 18:46:59 | 37.7633 | 15.0402 | 0.2  | 2.5 | 5  | 104 | 0.12 | 1.2 | 1.3   |
| 1984/10/17 19:25:16 | 37.7542 | 15.0290 | 0.1  | 2.8 | 5  | 97  | 0.28 | 2.1 | 2.4   |
| 1984/10/17 19:40:27 | 37.7263 | 15.0107 | 4.8  | 2.2 | 5  | 111 | 0.22 | 2.6 | 9     |
| 1984/10/17 19:46:42 | 37.7700 | 15.0303 | 3.6  | 3.2 | 5  | 100 | 0.76 | 7.7 | 999.9 |
| 1984/10/17 20:06:08 | 37.7385 | 15.0082 | 13.8 | 2.4 | 5  | 95  | 0.05 | 0.7 | 1.5   |
| 1984/10/17 20:11:06 | 37.7033 | 15.0160 | 20.3 | 2.9 | 5  | 150 | 0.42 | 9.1 | 14    |
| 1984/10/17 20:35:21 | 37.7678 | 15.0345 | 0.0  | 2.4 | 5  | 102 | 0.42 | 3.9 | 4.2   |
| 1984/10/17 20:42:22 | 37.7723 | 15.0633 | 3.1  | 2.6 | 5  | 121 | 0.45 | 4.7 | 999.9 |
| 1984/10/17 20:56:04 | 37.7447 | 15.0327 | 0.1  | 2.9 | 5  | 99  | 0.19 | 1.6 | 1.8   |
| 1984/10/17 21:33:15 | 37.7442 | 15.0472 | 0.5  | 2.7 | 5  | 104 | 0.1  | 1.1 | 1.1   |
| 1984/10/17 21:57:11 | 37.7503 | 15.0288 | 0.3  | 2.6 | 5  | 96  | 0.15 | 1.6 | 1.6   |
| 1984/10/17 22:23:01 | 37.7277 | 15.0028 | 28.1 | 3.4 | 5  | 133 | 0.01 | 0.3 | 0.6   |
| 1984/10/17 22:34:28 | 37.7678 | 14.9447 | 0.2  | 2.8 | 5  | 98  | 0.08 | 0.6 | 0.5   |
| 1984/10/17 22:39:07 | 37.7527 | 15.0265 | 0.1  | 2.1 | 5  | 95  | 0.48 | 1.3 | 1.5   |
| 1984/10/17 22:47:07 | 37.7503 | 15.0932 | 5.0  | 2.2 | 5  | 138 | 0.82 | 0.2 | 2     |
| 1984/10/17 23:10:00 | 37.7488 | 14.9913 | 3.2  | 1.9 | 5  | 90  | 0.28 | 2.8 | 630.2 |
| 1984/10/17 23:49:23 | 37.7357 | 15.0190 | 3.2  | 2.5 | 5  | 104 | 0.14 | 1.4 | 319.2 |
| 1984/10/18 00:14:29 | 37.7610 | 15.0198 | 0.5  | 2.7 | 8  | 96  | 0.43 | 2.1 | 1.9   |
| 1984/10/18 00:16:36 | 37.6993 | 14.9833 | 10.8 | 2.2 | 5  | 124 | 0.07 | 2.7 | 3.1   |
| 1984/10/18 00:18:22 | 37.7495 | 14.9905 | 0.2  | 3.2 | 8  | 91  | 0.47 | 2.4 | 2.8   |
| 1984/10/18 00:40:06 | 37.7428 | 15.0193 | 8.3  | 2.8 | 5  | 97  | 0.16 | 2   | 5.2   |
| 1984/10/18 00:48:28 | 37.7530 | 15.0272 | 0.1  | 2.1 | 5  | 95  | 0.29 | 3.2 | 3.8   |
| 1984/10/18 00:51:09 | 37.7347 | 15.0143 | 1.7  | 2.3 | 6  | 103 | 0.34 | 2.3 | 1.3   |
| 1984/10/18 00:52:32 | 37.7482 | 15.0253 | 2.2  | 1.7 | 6  | 94  | 0.17 | 1.2 | 0.8   |
| 1984/10/18 00:55:28 | 37.7582 | 15.0332 | 0.2  | 3.3 | 8  | 93  | 0.42 | 2   | 1.7   |
| 1984/10/18 00:58:53 | 37.7942 | 15.0195 | 0.2  | 2.7 | 5  | 119 | 0.17 | 2   | 2.1   |
| 1984/10/18 01:05:48 | 37.6830 | 14.8897 | 15.9 | 3.2 | 7  | 154 | 0.15 | 1.6 | 0.7   |
| 1984/10/18 01:21:35 | 37.7818 | 15.0253 | 0.8  | 2.4 | 5  | 109 | 0.32 | 3.3 | 722.1 |

|                     |         |         |      |     |    |     |      |      |       |
|---------------------|---------|---------|------|-----|----|-----|------|------|-------|
| 1984/10/18 01:23:04 | 37.7593 | 15.0192 | 0.4  | 2.8 | 7  | 95  | 0.43 | 2.4  | 2.1   |
| 1984/10/18 01:26:41 | 37.7640 | 15.0387 | 22.9 | 2   | 6  | 83  | 0.16 | 3.2  | 14.3  |
| 1984/10/18 01:28:12 | 37.6878 | 15.0827 | 33.9 | 3.2 | 9  | 86  | 0.32 | 5.4  | 11    |
| 1984/10/18 01:45:20 | 37.7813 | 15.0478 | 10.5 | 3.4 | 10 | 111 | 0.3  | 1.7  | 4.4   |
| 1984/10/18 01:58:44 | 37.7083 | 14.9395 | 7.1  | 3.2 | 11 | 94  | 0.42 | 2    | 3.5   |
| 1984/10/18 02:01:27 | 37.7257 | 14.9983 | 2.7  | 2.7 | 6  | 103 | 0.28 | 2.1  | 1.6   |
| 1984/10/18 02:07:33 | 37.7008 | 14.9785 | 8.9  | 1.9 | 6  | 120 | 0.19 | 3.7  | 4.4   |
| 1984/10/18 02:13:44 | 37.7120 | 15.0467 | 15.1 | 2.1 | 7  | 195 | 0.08 | 2.1  | 3.3   |
| 1984/10/18 02:17:38 | 37.7548 | 15.0170 | 2.7  | 2.3 | 6  | 110 | 0.28 | 1.9  | 2.7   |
| 1984/10/18 02:25:10 | 37.7653 | 15.0223 | 2.2  | 2.8 | 12 | 58  | 0.47 | 1.6  | 0.9   |
| 1984/10/18 02:27:58 | 37.7577 | 15.0187 | 0.7  | 2   | 8  | 176 | 0.42 | 2.2  | 1.6   |
| 1984/10/18 02:31:08 | 37.7457 | 15.0147 | 3.4  | 1.9 | 9  | 70  | 0.16 | 0.8  | 0.8   |
| 1984/10/18 02:31:34 | 37.8045 | 14.9913 | 7.6  | 2   | 5  | 134 | 0.12 | 1.5  | 6.7   |
| 1984/10/18 02:35:56 | 37.7577 | 15.0045 | 5.7  | 2.6 | 12 | 65  | 0.49 | 2    | 4.6   |
| 1984/10/18 02:38:18 | 37.7222 | 14.9897 | 0.1  | 2.2 | 5  | 114 | 0.36 | 1.6  | 2.2   |
| 1984/10/18 02:42:40 | 37.7830 | 15.0192 | 1.3  | 2   | 5  | 200 | 0.29 | 3.6  | 2.2   |
| 1984/10/18 02:42:55 | 37.7325 | 15.0295 | 5.0  | 2.6 | 5  | 212 | 0.42 | 3    | 3     |
| 1984/10/18 02:43:47 | 37.7353 | 15.0548 | 7.9  | 2.2 | 5  | 169 | 0.25 | 6.1  | 9.2   |
| 1984/10/18 03:05:54 | 37.7637 | 15.0315 | 0.1  | 2.2 | 5  | 100 | 0.33 | 2.9  | 3.1   |
| 1984/10/18 03:25:27 | 37.7248 | 15.0523 | 25.8 | 2.2 | 5  | 126 | 0.13 | 2.6  | 8.2   |
| 1984/10/18 03:28:08 | 37.7477 | 14.9812 | 3.3  | 2   | 5  | 125 | 0.62 | 6    | 999.9 |
| 1984/10/18 03:29:28 | 37.7315 | 14.9690 | 8.7  | 2   | 5  | 181 | 0.34 | 10.9 | 21.3  |
| 1984/10/18 03:35:26 | 37.7643 | 15.0368 | 0.2  | 1.9 | 5  | 103 | 0.19 | 1.8  | 2.1   |
| 1984/10/18 03:37:21 | 37.7487 | 14.9958 | 19.0 | 1.6 | 6  | 109 | 0.14 | 3    | 8.4   |
| 1984/10/18 03:38:14 | 37.7398 | 15.0500 | 8.8  | 2   | 7  | 81  | 0.14 | 1.2  | 2.4   |
| 1984/10/18 03:41:00 | 37.7307 | 15.0538 | 8.7  | 2.2 | 5  | 175 | 0.2  | 5.4  | 8.1   |
| 1984/10/18 03:48:12 | 37.7540 | 15.0253 | 4.8  | 2.7 | 9  | 60  | 0.22 | 1.1  | 4.7   |
| 1984/10/18 03:52:46 | 37.7822 | 15.0152 | 0.1  | 2.3 | 5  | 110 | 0.19 | 6.7  | 8.6   |
| 1984/10/18 03:53:45 | 37.7607 | 15.0143 | 2.4  | 2.3 | 8  | 91  | 0.11 | 0.6  | 0.4   |
| 1984/10/18 04:03:29 | 37.7255 | 15.0272 | 1.5  | 1.7 | 9  | 82  | 0.26 | 0.8  | 0.6   |
| 1984/10/18 04:04:40 | 37.7437 | 15.0018 | 3.7  | 2.3 | 12 | 68  | 0.41 | 1.5  | 2.8   |
| 1984/10/18 04:05:38 | 37.7467 | 15.0105 | 2.7  | 2.3 | 11 | 65  | 0.26 | 1    | 1.2   |
| 1984/10/18 04:22:58 | 37.7503 | 15.0602 | 4.7  | 2.2 | 5  | 188 | 0.4  | 6.6  | 28.7  |
| 1984/10/18 04:41:54 | 37.7548 | 15.0055 | 3.4  | 2.5 | 7  | 100 | 0.2  | 1.3  | 1.2   |
| 1984/10/18 04:49:16 | 37.7683 | 15.0357 | 5.0  | 2   | 5  | 112 | 0.45 | 4.6  | 11.7  |
| 1984/10/18 04:52:01 | 37.8375 | 15.0192 | 5.0  | 2.4 | 6  | 158 | 0.54 | 1.4  | 15.1  |
| 1984/10/18 04:53:22 | 37.7718 | 15.0148 | 1.2  | 2.3 | 6  | 103 | 0.07 | 0.5  | 0.4   |
| 1984/10/18 05:13:37 | 37.7705 | 15.0213 | 0.2  | 2.4 | 5  | 102 | 0.41 | 4.5  | 4.9   |
| 1984/10/18 05:20:16 | 37.7448 | 15.0310 | 5.0  | 2.4 | 5  | 99  | 0.12 | 1.4  | 8.8   |
| 1984/10/18 05:31:34 | 37.6887 | 15.0162 | 19.3 | 2.7 | 5  | 188 | 0.11 | 2.3  | 3.3   |
| 1984/10/18 05:34:42 | 37.7295 | 14.9917 | 16.0 | 3   | 8  | 72  | 0.27 | 2    | 0.9   |
| 1984/10/18 06:02:36 | 37.7565 | 15.0178 | 1.9  | 1.7 | 7  | 91  | 0.41 | 2.5  | 2.2   |
| 1984/10/18 06:04:00 | 37.6935 | 15.0940 | 10.5 | 2.4 | 5  | 260 | 0.24 | 12.1 | 11.5  |
| 1984/10/18 06:15:09 | 37.7240 | 14.9428 | 9.5  | 3.1 | 11 | 70  | 0.28 | 1.5  | 2.5   |
| 1984/10/18 06:28:06 | 37.7560 | 15.0170 | 2.3  | 3.3 | 12 | 62  | 0.38 | 1.3  | 0.9   |
| 1984/10/18 06:37:45 | 37.6763 | 15.0200 | 11.9 | 2.1 | 6  | 213 | 0.9  | 20   | 25.2  |
| 1984/10/18 06:39:41 | 37.7263 | 14.9883 | 12.2 | 3.2 | 9  | 91  | 0.38 | 2.7  | 4.3   |
| 1984/10/18 06:49:37 | 37.7560 | 15.0120 | 1.1  | 2.6 | 5  | 94  | 0.07 | 0.8  | 0.8   |
| 1984/10/18 06:51:07 | 37.7217 | 14.9762 | 8.6  | 2.7 | 5  | 78  | 0.13 | 1.6  | 2.8   |
| 1984/10/18 07:07:05 | 37.7713 | 15.0035 | 0.4  | 2.8 | 5  | 104 | 0.22 | 2.5  | 2.7   |

|                     |         |         |      |     |    |     |      |       |       |
|---------------------|---------|---------|------|-----|----|-----|------|-------|-------|
| 1984/10/18 07:10:01 | 37.7513 | 14.9873 | 15.1 | 2.2 | 5  | 92  | 0.17 | 2.4   | 5.6   |
| 1984/10/18 07:11:29 | 37.7628 | 14.9807 | 10.5 | 2.3 | 5  | 99  | 0.21 | 2.5   | 6.5   |
| 1984/10/18 07:16:42 | 37.6460 | 14.9173 | 38.0 | 3.1 | 7  | 183 | 0.09 | 2.4   | 4.9   |
| 1984/10/18 07:52:56 | 37.7757 | 14.9990 | 0.2  | 2.5 | 5  | 151 | 0.16 | 1.8   | 1.7   |
| 1984/10/18 08:02:54 | 37.7698 | 14.9912 | 7.9  | 3   | 5  | 104 | 0.07 | 1.2   | 10.5  |
| 1984/10/18 08:25:29 | 37.7402 | 14.9830 | 23.7 | 2.3 | 5  | 151 | 0.12 | 3.5   | 4.8   |
| 1984/10/18 08:29:59 | 37.7488 | 15.0183 | 3.5  | 2.6 | 5  | 91  | 0.06 | 0.6   | 141.1 |
| 1984/10/18 09:00:31 | 37.7155 | 15.0178 | 17.9 | 2.1 | 5  | 132 | 0.33 | 6.2   | 8.9   |
| 1984/10/18 09:19:27 | 37.7713 | 14.9507 | 0.0  | 2.9 | 5  | 102 | 0.3  | 2.4   | 1.9   |
| 1984/10/18 09:23:57 | 37.8592 | 14.9217 | 19.3 | 2.4 | 5  | 211 | 0.17 | 5.8   | 6.2   |
| 1984/10/18 10:51:45 | 37.7420 | 14.9497 | 3.2  | 2.5 | 7  | 83  | 0.27 | 1.6   | 1.9   |
| 1984/10/18 11:18:05 | 37.8153 | 15.0350 | 8.6  | 2   | 5  | 140 | 0.05 | 0.6   | 3.8   |
| 1984/10/18 11:58:47 | 37.8117 | 15.1135 | 2.3  | 4.2 | 12 | 158 | 0.51 | 2.5   | 13.9  |
| 1984/10/18 13:41:03 | 37.8005 | 15.0273 | 1.0  | 2.5 | 8  | 75  | 0.29 | 1.5   | 1.3   |
| 1984/10/18 13:44:42 | 37.4750 | 15.0028 | 4.1  | 0   | 5  | 328 | 0.58 | 145.6 | 288.4 |
| 1984/10/18 13:50:52 | 37.7485 | 15.0133 | 3.8  | 3.1 | 12 | 97  | 0.27 | 1.1   | 1.8   |
| 1984/10/18 14:13:11 | 37.7488 | 14.9798 | 5.0  | 2.2 | 6  | 92  | 0.18 | 1.9   | 3.3   |
| 1984/10/18 14:21:15 | 37.7678 | 14.9737 | 0.4  | 2.6 | 5  | 157 | 0.35 | 0.6   | 0.7   |
| 1984/10/18 15:27:08 | 37.7902 | 15.0118 | 5.0  | 2.5 | 5  | 117 | 0.23 | 2.9   | 15.5  |
| 1984/10/18 15:33:39 | 37.5758 | 14.7220 | 0.0  | 0   | 5  | 326 | 0.87 | 265.1 | 999.9 |
| 1984/10/18 17:25:11 | 37.8245 | 15.1205 | 0.2  | 2.5 | 5  | 173 | 0.49 | 5.6   | 3     |
| 1984/10/18 17:25:52 | 37.7697 | 15.0838 | 2.4  | 2.5 | 5  | 136 | 0.24 | 2.9   | 1.1   |
| 1984/10/18 17:36:11 | 37.5480 | 14.7362 | 11.6 | 3.3 | 13 | 268 | 0.29 | 3.5   | 1.2   |
| 1984/10/18 17:44:42 | 37.7267 | 14.9480 | 0.4  | 2.7 | 8  | 67  | 0.24 | 1.4   | 1.4   |
| 1984/10/18 22:03:44 | 37.7863 | 15.0177 | 2.0  | 3   | 5  | 113 | 0.48 | 4.9   | 999.9 |
| 1984/10/18 23:51:22 | 37.7893 | 15.0497 | 18.6 | 3.3 | 5  | 113 | 0.35 | 7.1   | 16    |
| 1984/10/19 00:02:16 | 37.7330 | 15.0870 | 15.7 | 2.3 | 5  | 126 | 0.12 | 4.6   | 12    |
| 1984/10/19 00:21:36 | 37.7418 | 15.1490 | 16.6 | 2.7 | 5  | 195 | 0.08 | 7.4   | 9.8   |
| 1984/10/19 00:26:04 | 37.7673 | 15.1383 | 6.3  | 2.2 | 6  | 185 | 0.18 | 3.5   | 15.6  |
| 1984/10/19 00:52:27 | 37.7653 | 15.1195 | 0.7  | 2.3 | 7  | 145 | 0.71 | 2.7   | 2.1   |
| 1984/10/19 00:56:31 | 37.6595 | 14.9853 | 1.6  | 2.1 | 5  | 253 | 0.14 | 3.8   | 1.2   |
| 1984/10/19 01:06:03 | 37.7267 | 15.0180 | 0.9  | 1.8 | 5  | 116 | 0.15 | 1.4   | 1.1   |
| 1984/10/19 01:09:52 | 37.7568 | 15.0140 | 2.5  | 3.4 | 14 | 62  | 0.42 | 1.4   | 0.8   |
| 1984/10/19 01:13:23 | 37.7730 | 15.0028 | 0.6  | 2.6 | 12 | 62  | 0.33 | 1.2   | 1.1   |
| 1984/10/19 01:20:04 | 37.7483 | 15.1175 | 9.9  | 2.3 | 7  | 133 | 0.09 | 1     | 1.5   |
| 1984/10/19 01:29:20 | 37.7490 | 15.0250 | 2.3  | 2.8 | 13 | 61  | 0.31 | 1.1   | 0.6   |
| 1984/10/19 01:31:55 | 37.7685 | 15.0128 | 0.6  | 1.9 | 9  | 94  | 0.42 | 1.6   | 1.5   |
| 1984/10/19 01:33:08 | 37.7570 | 14.9672 | 5.0  | 2.5 | 7  | 136 | 0.64 | 3.9   | 27.4  |
| 1984/10/19 01:47:50 | 37.6948 | 14.9542 | 33.1 | 2.1 | 5  | 237 | 0.09 | 16.2  | 31.9  |
| 1984/10/19 02:43:36 | 37.7548 | 15.0153 | 2.9  | 3.1 | 9  | 90  | 0.16 | 0.8   | 1     |
| 1984/10/19 02:55:46 | 37.7460 | 15.1027 | 10.5 | 2   | 5  | 117 | 0    | 0.2   | 0.2   |
| 1984/10/19 03:02:41 | 37.6847 | 15.1132 | 4.8  | 1.9 | 8  | 187 | 0.19 | 1.9   | 2.3   |
| 1984/10/19 03:08:31 | 37.6937 | 15.0430 | 0.0  | 3   | 6  | 165 | 0.31 | 1.5   | 1.8   |
| 1984/10/19 03:37:55 | 37.7453 | 15.0223 | 1.3  | 2.8 | 11 | 62  | 0.43 | 1.4   | 0.9   |
| 1984/10/19 03:44:38 | 37.7478 | 14.9673 | 0.9  | 2.6 | 7  | 88  | 0.69 | 4.3   | 3.8   |
| 1984/10/19 03:45:49 | 37.7502 | 15.0087 | 2.5  | 2.2 | 8  | 93  | 0.3  | 1.5   | 0.8   |
| 1984/10/19 03:53:18 | 37.7472 | 15.1098 | 10.5 | 2.3 | 6  | 118 | 0.05 | 0.8   | 1.2   |
| 1984/10/19 03:55:26 | 37.7535 | 15.0568 | 0.1  | 2.1 | 6  | 94  | 0.68 | 2.3   | 2.4   |
| 1984/10/19 03:57:24 | 37.7585 | 15.0002 | 17.3 | 2.3 | 5  | 179 | 0.13 | 4     | 8     |
| 1984/10/19 04:00:49 | 37.7577 | 15.0348 | 7.9  | 2.2 | 6  | 88  | 0.22 | 2     | 4.6   |

|                     |         |         |      |     |   |     |      |       |       |
|---------------------|---------|---------|------|-----|---|-----|------|-------|-------|
| 1984/10/19 04:04:28 | 37.7555 | 15.0943 | 10.5 | 2   | 6 | 100 | 0.13 | 1.8   | 2.7   |
| 1984/10/19 04:09:49 | 37.7557 | 15.0115 | 2.5  | 1.5 | 7 | 132 | 0.31 | 1.9   | 1.1   |
| 1984/10/19 04:16:10 | 37.7275 | 14.9880 | 3.0  | 1.9 | 6 | 118 | 0.24 | 1.8   | 1.4   |
| 1984/10/19 04:37:57 | 37.7387 | 14.9832 | 2.7  | 3   | 5 | 124 | 0.27 | 3     | 2.4   |
| 1984/10/19 05:17:35 | 37.7568 | 15.0467 | 1.1  | 1.8 | 8 | 105 | 0.27 | 1.4   | 1     |
| 1984/10/19 05:40:25 | 37.7492 | 15.0967 | 8.5  | 2.7 | 7 | 94  | 0.05 | 0.5   | 0.8   |
| 1984/10/19 05:41:43 | 37.7302 | 14.9902 | 17.7 | 2.1 | 5 | 209 | 0.15 | 6.6   | 10.5  |
| 1984/10/19 05:47:13 | 37.7455 | 15.1117 | 10.9 | 2.4 | 6 | 123 | 0.03 | 0.5   | 0.8   |
| 1984/10/19 05:50:27 | 37.7483 | 14.9187 | 0.0  | 2.7 | 7 | 95  | 0.42 | 1.9   | 2     |
| 1984/10/19 06:01:37 | 37.7855 | 14.9927 | 0.3  | 2.2 | 6 | 116 | 0.33 | 2.2   | 2.4   |
| 1984/10/19 06:29:10 | 37.7368 | 14.8208 | 0.6  | 3   | 5 | 274 | 0.98 | 50.1  | 999.9 |
| 1984/10/19 06:51:41 | 37.7607 | 15.0435 | 0.0  | 3.2 | 9 | 106 | 0.38 | 1.7   | 1.6   |
| 1984/10/19 06:58:57 | 37.7533 | 15.0260 | 2.4  | 3.2 | 9 | 95  | 0.13 | 0.6   | 0.4   |
| 1984/10/19 07:37:54 | 37.7547 | 14.9943 | 1.6  | 2.2 | 5 | 185 | 0.11 | 1.5   | 242.2 |
| 1984/10/19 10:21:31 | 37.7630 | 14.9038 | 10.5 | 3.2 | 5 | 113 | 0.45 | 5.8   | 13    |
| 1984/10/19 10:47:46 | 37.6547 | 15.1037 | 14.5 | 1.9 | 5 | 287 | 0.06 | 5.3   | 4.8   |
| 1984/10/19 15:05:36 | 37.7802 | 15.0047 | 0.1  | 2.6 | 7 | 97  | 0.54 | 2.4   | 2.4   |
| 1984/10/19 16:52:49 | 37.7292 | 14.9885 | 5.0  | 1.6 | 5 | 232 | 0.45 | 6.3   | 14.1  |
| 1984/10/19 17:43:11 | 37.7080 | 15.0790 | 0.1  | 4.2 | 6 | 101 | 0.35 | 0.2   | 0.1   |
| 1984/10/19 19:35:42 | 37.7730 | 15.0100 | 0.2  | 2.4 | 5 | 105 | 0.44 | 3.9   | 4.3   |
| 1984/10/19 21:52:34 | 37.7353 | 14.9668 | 4.8  | 2.7 | 5 | 81  | 0.05 | 0.5   | 1.7   |
| 1984/10/20 00:12:21 | 37.7297 | 15.1025 | 17.7 | 2.2 | 5 | 137 | 0.13 | 6.4   | 10.2  |
| 1984/10/20 01:15:15 | 37.7570 | 15.0098 | 3.4  | 2   | 5 | 167 | 0.16 | 1.9   | 351.5 |
| 1984/10/20 01:23:57 | 37.7603 | 15.0038 | 3.6  | 1.9 | 5 | 172 | 0.22 | 2.7   | 494.8 |
| 1984/10/20 01:46:07 | 37.7622 | 15.0110 | 1.9  | 2.1 | 5 | 165 | 0.18 | 2.3   | 1.7   |
| 1984/10/20 01:59:12 | 37.5002 | 15.5378 | 9.9  | 0   | 5 | 342 | 0.68 | 288.8 | 88.1  |
| 1984/10/20 02:25:20 | 37.6427 | 14.9823 | 20.4 | 2.1 | 5 | 276 | 0.24 | 20.4  | 18.1  |
| 1984/10/20 08:39:49 | 37.7667 | 15.1020 | 0.2  | 2.7 | 5 | 150 | 0.1  | 0.1   | 0.1   |
| 1984/10/20 09:39:31 | 37.7528 | 15.1010 | 5.0  | 3.2 | 5 | 146 | 0.57 | 7.8   | 61.1  |
| 1984/10/20 10:13:42 | 37.7538 | 15.0387 | 12.6 | 2.8 | 5 | 92  | 0.13 | 2.3   | 8.4   |
| 1984/10/20 10:44:21 | 37.7095 | 15.1330 | 20.1 | 1.9 | 6 | 162 | 0.62 | 27.7  | 38.6  |
| 1984/10/20 11:20:16 | 37.7547 | 15.0873 | 5.5  | 2.2 | 9 | 78  | 0.2  | 1.1   | 1.8   |
| 1984/10/20 14:16:29 | 37.7613 | 15.0880 | 5.5  | 2.1 | 9 | 137 | 0.41 | 2.3   | 3.7   |
| 1984/10/20 14:31:41 | 37.7702 | 15.0722 | 6.5  | 2.3 | 8 | 81  | 0.17 | 1.1   | 1.9   |
| 1984/10/20 14:48:16 | 37.8018 | 14.9355 | 18.0 | 2.4 | 5 | 217 | 0    | 0     | 0     |
| 1984/10/20 14:49:37 | 37.7393 | 15.0343 | 10.8 | 2.4 | 5 | 264 | 0.08 | 4.4   | 3.1   |
| 1984/10/20 15:32:15 | 37.7027 | 15.1472 | 11.3 | 2.3 | 8 | 200 | 0.31 | 5.9   | 6.9   |
| 1984/10/20 16:01:31 | 37.7623 | 15.0468 | 0.9  | 2.3 | 6 | 189 | 0.26 | 2     | 1.4   |
| 1984/10/20 16:10:30 | 37.7643 | 15.0083 | 10.1 | 2   | 7 | 196 | 0.19 | 2.2   | 5     |
| 1984/10/20 16:16:03 | 37.7652 | 14.9948 | 0.2  | 2.3 | 5 | 179 | 0.26 | 3.1   | 3     |
| 1984/10/20 16:17:17 | 37.7712 | 14.9622 | 10.7 | 2.4 | 9 | 132 | 0.36 | 3.1   | 7.5   |
| 1984/10/20 16:19:33 | 37.6710 | 15.1197 | 16.0 | 2.4 | 5 | 242 | 0.12 | 3.9   | 1     |
| 1984/10/20 16:23:21 | 37.6580 | 15.0958 | 0.7  | 2.5 | 7 | 229 | 0.21 | 2     | 0.8   |
| 1984/10/20 17:52:09 | 37.7533 | 15.1265 | 10.8 | 2.1 | 5 | 156 | 0.08 | 1.9   | 3.2   |
| 1984/10/20 18:09:13 | 37.7568 | 15.0185 | 5.0  | 2.2 | 5 | 120 | 0.36 | 18    | 169.6 |
| 1984/10/20 18:20:51 | 37.7708 | 15.0503 | 0.1  | 2   | 9 | 98  | 0.37 | 1.6   | 1.5   |
| 1984/10/20 18:34:27 | 37.8127 | 15.0302 | 0.0  | 2.3 | 5 | 107 | 0.29 | 2.3   | 2.8   |
| 1984/10/20 18:38:36 | 37.7920 | 15.0205 | 0.9  | 2.1 | 5 | 151 | 0.05 | 0.6   | 0.4   |
| 1984/10/20 23:26:20 | 37.8040 | 14.9905 | 34.3 | 2.9 | 5 | 132 | 0.21 | 7.9   | 16.3  |
| 1984/10/21 00:27:58 | 37.6852 | 15.1012 | 14.1 | 2   | 7 | 189 | 0.24 | 5.3   | 7.3   |

|                     |         |         |      |     |   |     |      |      |       |
|---------------------|---------|---------|------|-----|---|-----|------|------|-------|
| 1984/10/21 00:30:00 | 37.5092 | 15.4667 | 5.0  | 0   | 7 | 332 | 0.15 | 35.7 | 12.5  |
| 1984/10/21 00:32:45 | 37.7183 | 15.1342 | 9.3  | 2.6 | 8 | 171 | 0.15 | 2    | 2.5   |
| 1984/10/21 01:00:23 | 37.6777 | 15.1008 | 1.7  | 2.3 | 6 | 208 | 0.11 | 1    | 0.4   |
| 1984/10/21 01:01:05 | 37.7128 | 15.1672 | 16.5 | 2.1 | 5 | 230 | 0.42 | 21.5 | 16.8  |
| 1984/10/21 02:24:17 | 37.7598 | 15.0202 | 0.3  | 2.1 | 6 | 95  | 0.29 | 2.3  | 2.5   |
| 1984/10/21 02:24:54 | 37.8165 | 15.0095 | 0.0  | 2.5 | 5 | 140 | 0.1  | 0.8  | 0.8   |
| 1984/10/21 02:28:09 | 37.8142 | 15.0330 | 0.1  | 2.6 | 5 | 126 | 0.21 | 1.6  | 1.7   |
| 1984/10/21 02:30:47 | 37.7448 | 15.0460 | 10.4 | 2.2 | 5 | 134 | 0.13 | 3.4  | 6.4   |
| 1984/10/21 02:49:41 | 37.7790 | 15.0162 | 4.0  | 2.1 | 5 | 157 | 0.24 | 3.1  | 49.5  |
| 1984/10/21 03:00:25 | 37.7632 | 15.0662 | 11.8 | 2.3 | 5 | 108 | 0.17 | 4.3  | 8.4   |
| 1984/10/21 03:02:05 | 37.7728 | 15.0287 | 5.2  | 2.2 | 6 | 107 | 0.18 | 1.5  | 5.2   |
| 1984/10/21 03:11:48 | 37.7728 | 15.0252 | 8.7  | 2.2 | 5 | 151 | 0.2  | 3.4  | 9.9   |
| 1984/10/21 04:10:31 | 37.7697 | 15.0115 | 0.6  | 2.4 | 5 | 120 | 0.25 | 3.3  | 3.6   |
| 1984/10/21 04:34:05 | 37.8017 | 14.9563 | 0.4  | 2.3 | 5 | 132 | 0.27 | 0.2  | 0.3   |
| 1984/10/21 05:02:42 | 37.7412 | 15.0762 | 5.0  | 2.1 | 5 | 146 | 0.07 | 1.1  | 1.9   |
| 1984/10/21 05:04:48 | 37.7772 | 15.0065 | 1.3  | 2   | 5 | 166 | 0.19 | 2.5  | 1.9   |
| 1984/10/21 06:05:31 | 37.7740 | 15.0447 | 4.9  | 2.6 | 5 | 183 | 0.15 | 2.5  | 4     |
| 1984/10/21 10:50:48 | 37.7277 | 15.0288 | 6.6  | 2   | 6 | 118 | 0.23 | 2.2  | 5.3   |
| 1984/10/21 11:48:00 | 37.7700 | 15.0362 | 5.6  | 2.4 | 5 | 102 | 0.21 | 3.1  | 8.8   |
| 1984/10/21 12:04:16 | 37.7383 | 15.0700 | 2.6  | 2.4 | 5 | 116 | 0.18 | 2.4  | 19    |
| 1984/10/21 13:00:00 | 37.7717 | 15.0215 | 5.3  | 2.3 | 6 | 154 | 0.19 | 1.8  | 6     |
| 1984/10/21 13:09:39 | 37.7680 | 15.0088 | 6.0  | 2.5 | 5 | 166 | 0.22 | 3.3  | 13.5  |
| 1984/10/21 13:33:59 | 37.7488 | 15.0943 | 2.1  | 2   | 5 | 139 | 0.05 | 0.6  | 0.4   |
| 1984/10/21 13:42:52 | 37.7278 | 15.0702 | 6.4  | 2.4 | 8 | 116 | 0.32 | 2.1  | 3.7   |
| 1984/10/21 13:53:12 | 37.7598 | 15.1192 | 4.9  | 2.2 | 5 | 165 | 0    | 0.1  | 0.1   |
| 1984/10/21 13:57:01 | 37.7302 | 15.0400 | 12.2 | 2.2 | 6 | 148 | 0.15 | 2.2  | 4.6   |
| 1984/10/21 13:58:16 | 37.7180 | 15.0127 | 3.6  | 2.1 | 6 | 125 | 0.22 | 1.7  | 374.5 |
| 1984/10/21 13:59:13 | 37.6500 | 15.0375 | 25.7 | 2   | 5 | 274 | 0.28 | 30.6 | 42.6  |
| 1984/10/21 15:07:46 | 37.7418 | 14.9263 | 0.0  | 2.3 | 6 | 77  | 0.23 | 0.9  | 1.2   |
| 1984/10/21 15:11:08 | 37.7465 | 15.0092 | 13.6 | 2   | 6 | 97  | 0.2  | 12.9 | 44.6  |
| 1984/10/21 17:01:21 | 37.7327 | 15.0518 | 7.6  | 2.3 | 9 | 88  | 0.28 | 1.8  | 3.7   |
| 1984/10/21 18:00:54 | 37.7702 | 15.0445 | 10.0 | 2.3 | 5 | 97  | 0.02 | 0.4  | 0.9   |
| 1984/10/21 18:13:03 | 37.7605 | 15.0012 | 1.7  | 2.1 | 5 | 175 | 0.14 | 1.8  | 1.4   |
| 1984/10/22 00:15:46 | 37.7950 | 15.0005 | 3.6  | 2.1 | 5 | 124 | 0.59 | 6.6  | 999.9 |
| 1984/10/22 00:27:01 | 37.7485 | 15.1063 | 11.7 | 2.1 | 5 | 150 | 0.04 | 1.2  | 3     |
| 1984/10/22 00:45:39 | 37.7542 | 15.1307 | 8.7  | 2.4 | 9 | 171 | 0.26 | 2.7  | 4.2   |
| 1984/10/22 00:46:35 | 37.7572 | 15.2340 | 6.3  | 2.4 | 5 | 262 | 0.07 | 2.4  | 3.3   |
| 1984/10/22 00:47:55 | 37.7528 | 15.1018 | 10.3 | 1.9 | 7 | 97  | 0.22 | 2.7  | 5.6   |
| 1984/10/22 01:00:48 | 37.7562 | 15.0145 | 9.9  | 1.7 | 5 | 123 | 0.34 | 13.4 | 57.1  |
| 1984/10/22 01:23:56 | 37.7843 | 15.0263 | 0.7  | 1.8 | 5 | 148 | 0.16 | 2.5  | 2.4   |
| 1984/10/22 01:31:48 | 37.7647 | 15.1545 | 7.8  | 1.9 | 5 | 227 | 0.2  | 6.7  | 4.8   |
| 1984/10/22 02:06:38 | 37.6807 | 15.1003 | 2.3  | 2.3 | 6 | 199 | 0.14 | 1.2  | 0.5   |
| 1984/10/22 02:41:16 | 37.8132 | 15.0415 | 0.0  | 2.3 | 8 | 83  | 0.3  | 1.1  | 1.1   |
| 1984/10/22 02:44:47 | 37.7573 | 15.1353 | 8.5  | 2.4 | 9 | 181 | 0.2  | 1.9  | 2.4   |
| 1984/10/22 02:48:03 | 37.7178 | 14.9562 | 17.3 | 2   | 6 | 250 | 0.24 | 8.6  | 9.5   |
| 1984/10/22 03:04:34 | 37.7347 | 15.1003 | 1.6  | 2.1 | 5 | 109 | 0.16 | 7.6  | 7.2   |
| 1984/10/22 03:07:49 | 37.7528 | 15.0285 | 11.6 | 2.9 | 7 | 83  | 0.27 | 2.9  | 10.6  |
| 1984/10/22 03:54:37 | 37.7062 | 14.9732 | 8.5  | 1.8 | 5 | 149 | 0.29 | 12.5 | 18.3  |
| 1984/10/22 04:44:45 | 37.6895 | 14.9308 | 5.4  | 2.7 | 9 | 236 | 0.65 | 8.8  | 10.2  |
| 1984/10/22 07:36:35 | 37.7313 | 15.1043 | 1.7  | 2.4 | 7 | 140 | 0.41 | 1.7  | 1.9   |

|                     |         |         |      |     |    |     |      |      |       |
|---------------------|---------|---------|------|-----|----|-----|------|------|-------|
| 1984/10/22 07:52:09 | 37.5838 | 15.0927 | 29.2 | 2.6 | 6  | 299 | 0.16 | 20.2 | 14.8  |
| 1984/10/22 08:33:14 | 37.7340 | 15.1262 | 2.2  | 2.5 | 5  | 166 | 0.14 | 1.7  | 0.9   |
| 1984/10/22 12:15:52 | 37.7038 | 15.1398 | 2.3  | 2.2 | 6  | 177 | 0.68 | 5.5  | 2.9   |
| 1984/10/22 12:18:25 | 37.7953 | 15.0178 | 0.4  | 2.5 | 6  | 135 | 0.23 | 1.4  | 1     |
| 1984/10/22 12:31:18 | 37.7833 | 15.0188 | 0.9  | 2.1 | 5  | 154 | 0.11 | 1.3  | 1.1   |
| 1984/10/22 12:54:27 | 37.7008 | 15.1997 | 11.5 | 2.1 | 5  | 285 | 0.88 | 60.2 | 38.5  |
| 1984/10/22 14:42:42 | 37.7297 | 15.0602 | 13.9 | 2   | 5  | 135 | 0.26 | 5.4  | 11.7  |
| 1984/10/22 14:53:38 | 37.2880 | 14.7353 | 0.2  | 0   | 6  | 346 | 0.13 | 94.5 | 183.6 |
| 1984/10/22 15:11:33 | 37.7882 | 15.0327 | 1.6  | 2.2 | 5  | 121 | 0.14 | 1.4  | 1.1   |
| 1984/10/22 15:18:17 | 37.7358 | 15.1042 | 7.8  | 2.6 | 12 | 114 | 0.18 | 1.1  | 1.7   |
| 1984/10/22 15:51:40 | 37.7477 | 15.0882 | 23.4 | 2.3 | 5  | 85  | 0.11 | 4.7  | 12.2  |
| 1984/10/22 16:41:21 | 37.7713 | 15.0250 | 3.6  | 2   | 5  | 127 | 0.4  | 4.5  | 884.1 |
| 1984/10/22 17:43:55 | 37.7623 | 15.0048 | 1.4  | 1.9 | 5  | 171 | 0.07 | 0.9  | 0.7   |
| 1984/10/22 18:25:24 | 37.8357 | 15.0000 | 15.5 | 3   | 6  | 97  | 0.27 | 3.2  | 2.2   |
| 1984/10/22 23:28:41 | 37.6998 | 15.1233 | 0.3  | 2.1 | 5  | 135 | 0.13 | 0.5  | 4.5   |
| 1984/10/23 00:14:09 | 37.7002 | 14.9700 | 2.0  | 2.9 | 12 | 95  | 0.3  | 1    | 0.5   |
| 1984/10/23 00:34:14 | 37.7615 | 15.0300 | 16.5 | 2.3 | 5  | 99  | 0.29 | 4.8  | 9.4   |
| 1984/10/23 01:01:36 | 37.7452 | 15.0405 | 9.8  | 1.9 | 5  | 188 | 0.01 | 0.2  | 0.4   |
| 1984/10/23 01:49:47 | 37.6857 | 15.0872 | 6.3  | 2.1 | 8  | 182 | 0.24 | 2.3  | 3.3   |
| 1984/10/23 02:12:23 | 37.6738 | 15.0947 | 0.1  | 2.5 | 6  | 212 | 0.09 | 0.5  | 0.3   |
| 1984/10/23 02:26:37 | 37.7365 | 15.0570 | 14.2 | 1.7 | 5  | 189 | 0.13 | 4.9  | 16.6  |
| 1984/10/23 02:31:21 | 37.6853 | 15.0805 | 7.4  | 2.1 | 6  | 188 | 0.09 | 1.4  | 2     |
| 1984/10/23 03:57:38 | 37.7543 | 15.0543 | 1.4  | 1.9 | 7  | 85  | 0.22 | 1.3  | 1.2   |
| 1984/10/23 04:00:39 | 37.7430 | 15.0423 | 2.3  | 2   | 10 | 72  | 0.39 | 1.4  | 0.8   |
| 1984/10/23 04:10:30 | 37.6840 | 15.0827 | 2.5  | 1.9 | 8  | 184 | 0.19 | 1.3  | 0.6   |
| 1984/10/23 04:40:04 | 37.7590 | 15.0323 | 8.5  | 1.9 | 8  | 81  | 0.19 | 1.5  | 6.7   |
| 1984/10/23 04:48:20 | 37.7832 | 15.0322 | 0.6  | 1.9 | 5  | 209 | 0.36 | 5.7  | 4.5   |
| 1984/10/23 04:55:57 | 37.7410 | 15.0758 | 5.6  | 2.1 | 7  | 106 | 0.19 | 1.4  | 2.2   |
| 1984/10/23 05:51:15 | 37.7470 | 15.0472 | 7.3  | 2.1 | 5  | 182 | 0.09 | 1.7  | 2.6   |
| 1984/10/23 06:21:29 | 37.6955 | 15.0143 | 1.9  | 2.7 | 5  | 173 | 0.88 | 17.3 | 10.7  |
| 1984/10/23 06:32:22 | 37.7542 | 15.0270 | 17.3 | 2.1 | 5  | 184 | 0.36 | 0.2  | 0.4   |
| 1984/10/23 09:24:45 | 37.7967 | 14.9873 | 3.1  | 2   | 5  | 125 | 0.78 | 8.2  | 999.9 |
| 1984/10/23 11:01:16 | 37.7658 | 15.0067 | 1.3  | 2   | 8  | 76  | 0.42 | 2.3  | 2.5   |
| 1984/10/23 11:46:27 | 37.7742 | 15.0213 | 1.6  | 2   | 5  | 154 | 0.19 | 2.3  | 1.7   |
| 1984/10/23 14:18:46 | 37.7110 | 14.9660 | 0.2  | 1.9 | 5  | 85  | 0.35 | 1.5  | 1.7   |
| 1984/10/23 14:23:43 | 37.8033 | 14.9662 | 16.7 | 2.1 | 6  | 119 | 0.19 | 2.5  | 4.2   |
| 1984/10/23 14:25:40 | 38.0370 | 14.7778 | 36.4 | 0   | 6  | 296 | 0.25 | 26.2 | 18    |
| 1984/10/23 14:27:24 | 38.2283 | 14.7143 | 5.0  | 0   | 5  | 319 | 0.42 | 39.2 | 15.3  |
| 1984/10/23 14:31:11 | 37.8298 | 14.9255 | 21.9 | 2.7 | 6  | 113 | 0.02 | 0.4  | 0.6   |
| 1984/10/23 14:32:37 | 37.8548 | 14.9622 | 8.8  | 1.9 | 5  | 99  | 0.55 | 1.3  | 2.5   |
| 1984/10/23 14:35:05 | 37.7210 | 15.0950 | 7.8  | 2.3 | 12 | 100 | 0.25 | 1.5  | 2.5   |
| 1984/10/23 14:35:33 | 37.7223 | 15.1000 | 7.6  | 2.9 | 12 | 107 | 0.38 | 2.4  | 3.9   |
| 1984/10/23 14:40:46 | 37.7455 | 15.1500 | 1.8  | 2.5 | 5  | 232 | 0.04 | 0.7  | 0.4   |
| 1984/10/23 14:45:27 | 37.7307 | 15.0818 | 10.2 | 3   | 7  | 115 | 0.08 | 0.9  | 1.9   |
| 1984/10/23 15:13:23 | 37.7635 | 14.9792 | 0.2  | 1.8 | 5  | 167 | 0.59 | 5.4  | 4.9   |
| 1984/10/23 15:17:12 | 37.7797 | 14.9632 | 7.0  | 1.5 | 5  | 123 | 0.61 | 1.6  | 10.9  |
| 1984/10/23 15:30:24 | 37.6613 | 14.9502 | 7.9  | 2.6 | 5  | 277 | 0.05 | 3.8  | 3     |
| 1984/10/23 17:20:06 | 37.8290 | 14.8518 | 48.1 | 1.9 | 7  | 206 | 0.15 | 5.3  | 14.5  |
| 1984/10/23 18:04:43 | 37.7648 | 15.0517 | 5.0  | 2.1 | 5  | 112 | 0.16 | 26.1 | 822.3 |
| 1984/10/23 23:08:43 | 37.6005 | 14.9655 | 25.2 | 1.5 | 5  | 275 | 0.4  | 55.8 | 59.9  |



|                     |         |         |      |     |    |     |      |      |       |
|---------------------|---------|---------|------|-----|----|-----|------|------|-------|
| 1984/10/24 00:40:31 | 37.7660 | 15.0155 | 1.5  | 2.1 | 8  | 73  | 0.34 | 1.7  | 1.6   |
| 1984/10/24 00:51:09 | 37.7688 | 15.0120 | 2.8  | 2   | 8  | 137 | 0.2  | 1.2  | 2.2   |
| 1984/10/24 01:58:13 | 37.7420 | 15.0012 | 5.0  | 1.5 | 5  | 142 | 0.4  | 34.9 | 205.9 |
| 1984/10/24 02:06:57 | 37.7782 | 15.0390 | 9.5  | 2   | 5  | 118 | 0.48 | 14.4 | 76.7  |
| 1984/10/24 02:27:17 | 37.7520 | 15.0537 | 6.7  | 2.4 | 10 | 64  | 0.21 | 1.1  | 2.4   |
| 1984/10/24 02:28:36 | 37.6415 | 15.1213 | 19.8 | 2.1 | 7  | 274 | 0.38 | 19.5 | 17    |
| 1984/10/24 02:40:50 | 37.7570 | 14.9332 | 8.4  | 2   | 5  | 210 | 0.03 | 1.2  | 4.7   |
| 1984/10/24 02:45:15 | 37.7797 | 15.0037 | 0.2  | 1.8 | 12 | 62  | 0.41 | 1.2  | 1.1   |
| 1984/10/24 02:54:50 | 37.7397 | 15.0433 | 17.4 | 2   | 5  | 134 | 0.2  | 19   | 35.5  |
| 1984/10/24 02:59:47 | 37.7465 | 15.0710 | 6.8  | 2.2 | 8  | 92  | 0.36 | 2.4  | 4.2   |
| 1984/10/24 03:12:32 | 37.7473 | 15.1398 | 8.0  | 1.8 | 5  | 184 | 0.05 | 0.8  | 1     |
| 1984/10/24 03:46:00 | 37.7613 | 15.1000 | 0.8  | 1.4 | 6  | 81  | 0.39 | 2    | 1.5   |
| 1984/10/24 04:15:36 | 37.7663 | 14.9357 | 24.2 | 1.7 | 5  | 160 | 0.11 | 4.9  | 13.4  |
| 1984/10/24 04:46:32 | 37.7737 | 15.0462 | 0.0  | 2.6 | 7  | 110 | 0.08 | 0.3  | 0.3   |
| 1984/10/24 05:18:58 | 37.7782 | 15.0200 | 3.8  | 2.2 | 5  | 154 | 0.17 | 2.6  | 51    |
| 1984/10/24 05:26:17 | 37.7803 | 15.0220 | 2.9  | 2   | 5  | 152 | 0.11 | 1.3  | 2     |
| 1984/10/24 05:51:09 | 37.7597 | 15.0197 | 10.8 | 1.4 | 7  | 90  | 0.13 | 1.4  | 4.5   |
| 1984/10/24 05:56:33 | 37.7665 | 15.0462 | 7.3  | 2.2 | 8  | 86  | 0.27 | 2    | 4.9   |
| 1984/10/24 06:18:21 | 37.7567 | 15.0283 | 9.3  | 1.9 | 5  | 97  | 0.08 | 1.6  | 8.2   |
| 1984/10/24 06:29:29 | 37.7478 | 15.0847 | 1.8  | 2.2 | 7  | 130 | 0.17 | 1.1  | 0.9   |
| 1984/10/24 06:49:43 | 37.7607 | 15.0327 | 8.2  | 2   | 10 | 80  | 0.28 | 1.4  | 4.2   |
| 1984/10/24 06:56:22 | 37.7588 | 15.0562 | 13.0 | 2.2 | 5  | 113 | 0.1  | 2.1  | 8.8   |
| 1984/10/24 07:24:38 | 37.6872 | 14.9200 | 0.2  | 1.6 | 5  | 277 | 0.43 | 6.4  | 2.9   |
| 1984/10/24 07:30:15 | 37.8247 | 15.0378 | 4.1  | 1.5 | 5  | 100 | 0.21 | 4.7  | 216.3 |
| 1984/10/24 07:30:34 | 37.7553 | 14.9860 | 5.7  | 1.6 | 5  | 212 | 0.15 | 4    | 15.6  |
| 1984/10/24 07:35:05 | 37.8008 | 15.0290 | 0.8  | 2.2 | 5  | 141 | 0.06 | 0.9  | 0.8   |
| 1984/10/24 09:51:11 | 37.7108 | 15.1263 | 19.2 | 2.1 | 5  | 254 | 0.31 | 32.2 | 36.1  |
| 1984/10/24 11:20:09 | 37.7818 | 14.9982 | 5.0  | 2.3 | 5  | 122 | 0.62 | 7.7  | 180.3 |
| 1984/10/24 13:58:45 | 37.7303 | 15.0857 | 9.3  | 1.8 | 6  | 140 | 0.11 | 1.9  | 2.6   |
| 1984/10/24 14:01:34 | 37.7462 | 15.0853 | 2.7  | 3   | 13 | 84  | 0.47 | 1.6  | 1.5   |
| 1984/10/24 14:04:30 | 37.7793 | 15.0280 | 0.1  | 1.8 | 5  | 189 | 0.27 | 7.9  | 10.5  |
| 1984/10/24 14:05:07 | 37.7392 | 15.0478 | 0.1  | 1.9 | 8  | 102 | 0.32 | 1.3  | 1.6   |
| 1984/10/24 14:05:39 | 37.7807 | 15.0472 | 1.5  | 2.4 | 5  | 105 | 0.48 | 6.5  | 5.3   |
| 1984/10/24 14:06:52 | 37.7448 | 15.0847 | 5.7  | 2.4 | 9  | 84  | 0.52 | 2.8  | 4.8   |
| 1984/10/24 15:04:08 | 37.7405 | 15.0923 | 15.0 | 3.2 | 12 | 134 | 0.28 | 1.7  | 1.3   |
| 1984/10/24 15:05:57 | 37.7307 | 15.0543 | 14.5 | 2.5 | 6  | 125 | 0.8  | 1.4  | 4.3   |
| 1984/10/24 15:10:04 | 37.6235 | 15.1185 | 0.3  | 2.5 | 5  | 172 | 0.15 | 1.2  | 0.8   |
| 1984/10/24 15:16:13 | 37.7495 | 15.0338 | 1.2  | 2.4 | 6  | 98  | 0.26 | 2    | 1.9   |
| 1984/10/24 16:11:23 | 37.7632 | 15.0762 | 6.0  | 2.4 | 7  | 128 | 0.2  | 1.5  | 6.3   |
| 1984/10/24 16:39:27 | 37.7605 | 15.0427 | 9.9  | 2   | 5  | 137 | 0.21 | 4.3  | 9.6   |
| 1984/10/24 16:48:27 | 37.7152 | 15.0752 | 2.4  | 1.7 | 8  | 124 | 0.37 | 1.9  | 1.3   |
| 1984/10/24 17:56:23 | 37.7015 | 15.0308 | 29.1 | 2.4 | 9  | 121 | 0.33 | 11.2 | 21.1  |
| 1984/10/24 21:02:40 | 37.7002 | 15.1055 | 0.7  | 3.2 | 6  | 109 | 0.29 | 2.7  | 2.9   |
| 1984/10/24 23:45:51 | 37.7587 | 15.0715 | 2.7  | 2.3 | 6  | 124 | 0.39 | 3    | 4.6   |
| 1984/10/25 00:45:36 | 37.7618 | 15.0443 | 4.2  | 2.2 | 5  | 191 | 0.09 | 1.4  | 19.1  |
| 1984/10/25 01:03:07 | 37.7218 | 15.1247 | 0.3  | 1.5 | 5  | 151 | 0.86 | 7.3  | 157.9 |
| 1984/10/25 01:11:49 | 37.6657 | 15.0770 | 0.2  | 3.9 | 10 | 107 | 0.53 | 2    | 1.7   |
| 1984/10/25 01:46:57 | 37.7847 | 15.0590 | 0.0  | 1.9 | 7  | 119 | 0.22 | 1.3  | 1.5   |
| 1984/10/25 02:15:15 | 37.6402 | 15.0913 | 0.0  | 2.9 | 9  | 137 | 0.32 | 1.5  | 1.2   |
| 1984/10/25 02:34:32 | 37.7638 | 15.0313 | 10.9 | 1.9 | 5  | 147 | 0.24 | 5.1  | 13.3  |

|                     |         |         |      |     |   |     |      |      |       |
|---------------------|---------|---------|------|-----|---|-----|------|------|-------|
| 1984/10/25 02:39:51 | 37.7413 | 15.0122 | 5.0  | 1.4 | 5 | 130 | 0.32 | 21.4 | 127.9 |
| 1984/10/25 02:41:13 | 37.7520 | 15.0232 | 12.6 | 2.2 | 5 | 155 | 0.35 | 9.4  | 24    |
| 1984/10/25 02:41:35 | 37.7803 | 15.0352 | 2.3  | 1.8 | 8 | 72  | 0.48 | 2.5  | 1.9   |
| 1984/10/25 03:26:28 | 37.8105 | 15.0557 | 20.1 | 2.4 | 5 | 125 | 0.38 | 12.8 | 39.2  |
| 1984/10/25 04:36:11 | 37.7678 | 15.1177 | 9.2  | 2   | 5 | 165 | 0.15 | 7.9  | 29.2  |
| 1984/10/25 07:57:16 | 37.8458 | 15.0367 | 16.4 | 3.3 | 5 | 196 | 0.11 | 5.4  | 9.4   |
| 1984/10/25 09:50:27 | 37.2527 | 14.8008 | 5.0  | 0   | 5 | 311 | 0.86 | 116  | 38.4  |
| 1984/10/25 11:14:26 | 37.7675 | 15.0758 | 5.4  | 2.2 | 5 | 129 | 0.05 | 0.7  | 4.7   |
| 1984/10/25 11:17:24 | 37.7290 | 15.0362 | 22.8 | 1.9 | 5 | 118 | 0.69 | 35.4 | 97.9  |
| 1984/10/25 11:18:53 | 37.7655 | 15.0383 | 0.2  | 2.2 | 6 | 104 | 0.2  | 1.4  | 1.4   |
| 1984/10/25 12:41:37 | 37.7628 | 15.0150 | 9.7  | 2.6 | 8 | 98  | 0.2  | 1.3  | 3.2   |
| 1984/10/25 12:49:08 | 37.7403 | 15.0773 | 6.1  | 1.8 | 6 | 91  | 0.24 | 2.6  | 7.1   |
| 1984/10/25 13:03:23 | 37.6880 | 15.1225 | 2.4  | 1.8 | 5 | 180 | 0.47 | 5.7  | 1.6   |
| 1984/10/25 13:22:36 | 37.7540 | 15.0678 | 12.5 | 1.7 | 6 | 115 | 0.33 | 5.9  | 12    |
| 1984/10/25 13:24:32 | 37.7392 | 15.0653 | 9.2  | 1.9 | 5 | 121 | 0.31 | 7.8  | 21.3  |
| 1984/10/25 13:38:53 | 37.7610 | 14.9392 | 17.8 | 1.7 | 5 | 253 | 0.17 | 11.1 | 15.9  |
| 1984/10/25 13:54:34 | 37.6670 | 15.1090 | 1.3  | 2.3 | 8 | 224 | 0.31 | 2.4  | 1.2   |
| 1984/10/25 14:04:50 | 37.7828 | 15.0325 | 3.3  | 1.6 | 7 | 101 | 0.46 | 2.9  | 4.3   |
| 1984/10/25 14:53:46 | 37.7408 | 15.0490 | 10.1 | 2   | 7 | 106 | 0.3  | 2.9  | 6.5   |
| 1984/10/25 15:31:06 | 37.7022 | 15.0903 | 5.3  | 1.8 | 5 | 156 | 0.35 | 5.4  | 7.6   |
| 1984/10/25 15:46:19 | 37.7702 | 15.0457 | 21.0 | 2.5 | 5 | 139 | 0.09 | 0.6  | 2.2   |
| 1984/10/25 15:54:19 | 37.7123 | 15.1208 | 2.1  | 2   | 6 | 137 | 0.29 | 2.1  | 1     |
| 1984/10/25 16:06:06 | 37.7750 | 15.0418 | 7.7  | 2.1 | 6 | 94  | 0.08 | 0.9  | 2.4   |
| 1984/10/25 16:07:12 | 37.7437 | 15.1262 | 14.3 | 2.2 | 5 | 240 | 0.39 | 17   | 22.7  |
| 1984/10/25 16:21:42 | 37.7628 | 15.0637 | 8.8  | 2   | 7 | 101 | 0.47 | 3.8  | 7.6   |
| 1984/10/25 16:27:17 | 37.7525 | 15.0647 | 13.0 | 2.2 | 8 | 71  | 0.18 | 2.3  | 5     |
| 1984/10/25 16:34:27 | 37.7460 | 15.0968 | 7.2  | 1.6 | 6 | 140 | 0.18 | 1.9  | 2.7   |
| 1984/10/25 16:35:34 | 37.7733 | 14.9772 | 3.1  | 1.5 | 6 | 119 | 0.31 | 2.3  | 534.7 |
| 1984/10/25 16:39:32 | 37.7500 | 15.0235 | 10.7 | 1.9 | 5 | 155 | 0.17 | 4.1  | 9.9   |
| 1984/10/25 16:45:32 | 37.7652 | 15.0387 | 8.5  | 2   | 6 | 78  | 0.09 | 0.9  | 2.5   |
| 1984/10/25 16:50:09 | 37.7688 | 15.0562 | 2.6  | 2.1 | 6 | 115 | 0.21 | 1.6  | 370.2 |
| 1984/10/25 16:51:14 | 37.7488 | 15.0440 | 7.3  | 2.2 | 6 | 93  | 0.25 | 2.6  | 10.1  |
| 1984/10/25 16:51:56 | 37.7598 | 15.0502 | 14.1 | 1.8 | 5 | 160 | 0.04 | 0.8  | 1.8   |
| 1984/10/25 16:56:14 | 37.7193 | 15.2043 | 18.1 | 2.1 | 6 | 259 | 0.28 | 19.4 | 16.1  |
| 1984/10/25 17:16:18 | 37.7777 | 15.0180 | 5.0  | 1.6 | 5 | 99  | 0.56 | 10.7 | 258.8 |
| 1984/10/25 17:53:26 | 37.7290 | 15.1423 | 11.1 | 1.8 | 6 | 186 | 0.04 | 0.7  | 0.9   |
| 1984/10/25 17:53:47 | 37.7585 | 15.0498 | 6.4  | 2   | 6 | 130 | 0.2  | 1.8  | 3.3   |
| 1984/10/25 18:17:02 | 37.7570 | 15.0910 | 2.4  | 1.5 | 6 | 110 | 0.55 | 3.9  | 1.4   |
| 1984/10/25 18:17:18 | 37.8283 | 14.9873 | 9.1  | 1.2 | 7 | 87  | 0.93 | 12.4 | 63.7  |
| 1984/10/25 18:28:38 | 37.7348 | 15.1293 | 17.6 | 2.1 | 5 | 246 | 0.19 | 12.5 | 11.2  |
| 1984/10/25 20:18:09 | 37.7357 | 14.9607 | 19.5 | 2.8 | 5 | 83  | 0.05 | 0.8  | 1.4   |
| 1984/10/25 21:11:57 | 37.7667 | 14.9763 | 13.2 | 3.1 | 5 | 101 | 0.02 | 0.3  | 0.7   |
| 1984/10/25 22:47:46 | 37.8013 | 15.0515 | 0.1  | 2.6 | 5 | 116 | 0.49 | 5.4  | 5.2   |
| 1984/10/25 23:21:41 | 37.7853 | 14.9923 | 3.6  | 2.3 | 5 | 142 | 0.58 | 6.4  | 999.9 |
| 1984/10/25 23:41:42 | 37.7610 | 15.0372 | 7.0  | 1.8 | 5 | 172 | 0.14 | 2    | 3.7   |
| 1984/10/25 23:49:00 | 37.7620 | 15.0552 | 3.5  | 1.7 | 6 | 113 | 0.3  | 2.2  | 521   |
| 1984/10/25 23:53:28 | 37.7612 | 15.1102 | 3.6  | 1.3 | 6 | 157 | 0.14 | 1.3  | 1     |
| 1984/10/26 00:10:50 | 37.6830 | 15.0738 | 0.3  | 1.6 | 5 | 193 | 0.11 | 0.7  | 11.9  |
| 1984/10/26 00:37:17 | 37.7510 | 15.1375 | 7.1  | 2.1 | 6 | 182 | 0.12 | 1.4  | 1.8   |
| 1984/10/26 02:12:31 | 37.8528 | 14.9967 | 20.4 | 2.6 | 5 | 260 | 0.24 | 16.9 | 32    |

|                     |         |         |      |     |    |     |      |      |       |
|---------------------|---------|---------|------|-----|----|-----|------|------|-------|
| 1984/10/26 02:20:21 | 37.7138 | 14.9040 | 9.0  | 1.7 | 5  | 180 | 0.48 | 19.2 | 29.6  |
| 1984/10/26 02:20:45 | 37.7160 | 14.9917 | 1.5  | 2.6 | 7  | 103 | 0.41 | 2.8  | 2.7   |
| 1984/10/26 02:24:23 | 37.7543 | 14.9865 | 10.6 | 2.8 | 10 | 71  | 0.2  | 1    | 3.1   |
| 1984/10/26 02:33:05 | 37.7377 | 15.0658 | 5.0  | 2   | 5  | 172 | 0.06 | 1    | 1.8   |
| 1984/10/26 03:25:42 | 37.7520 | 15.2437 | 13.4 | 2.7 | 6  | 268 | 0.05 | 2.1  | 1.9   |
| 1984/10/26 03:34:36 | 37.7832 | 15.0803 | 3.6  | 2.6 | 7  | 92  | 0.35 | 2.2  | 2.3   |
| 1984/10/26 03:48:13 | 37.7330 | 15.1158 | 5.4  | 2   | 5  | 136 | 0.03 | 0.5  | 1.1   |
| 1984/10/26 03:57:00 | 37.7227 | 15.2820 | 3.2  | 0   | 6  | 291 | 0.36 | 17.3 | 618.9 |
| 1984/10/26 04:34:36 | 37.7327 | 15.1070 | 7.3  | 1.7 | 5  | 120 | 0.04 | 0.7  | 1.8   |
| 1984/10/26 04:40:17 | 37.7707 | 15.0140 | 0.3  | 2   | 5  | 161 | 0.07 | 0.8  | 0.8   |
| 1984/10/26 04:50:35 | 37.7813 | 15.1358 | 6.3  | 2.5 | 7  | 184 | 0.17 | 1.8  | 2.3   |
| 1984/10/26 05:01:41 | 37.7702 | 15.1535 | 7.4  | 2.3 | 6  | 225 | 0.08 | 1.5  | 1.3   |
| 1984/10/26 05:06:52 | 37.7745 | 15.0290 | 2.1  | 3.1 | 12 | 66  | 0.35 | 1.2  | 0.7   |
| 1984/10/26 05:33:10 | 37.8212 | 15.0785 | 11.3 | 2.9 | 5  | 113 | 0.04 | 1.8  | 5.6   |
| 1984/10/26 06:18:22 | 37.7637 | 15.0768 | 10.4 | 2   | 9  | 67  | 0.28 | 2.1  | 4.3   |
| 1984/10/26 06:43:20 | 37.6505 | 15.0837 | 1.0  | 1.8 | 5  | 245 | 0.18 | 3.3  | 1.4   |
| 1984/10/26 06:46:19 | 37.7278 | 15.0475 | 3.2  | 2   | 8  | 122 | 0.44 | 2.4  | 2.9   |
| 1984/10/26 07:17:08 | 37.6832 | 15.0312 | 10.4 | 2.8 | 5  | 168 | 0.05 | 0.8  | 1.1   |
| 1984/10/26 07:43:36 | 37.7490 | 15.0555 | 3.6  | 2.3 | 5  | 110 | 0.31 | 3.1  | 682.5 |
| 1984/10/26 08:57:44 | 37.7648 | 15.0592 | 2.1  | 2.9 | 5  | 117 | 0.46 | 4.7  | 999.9 |
| 1984/10/26 11:37:53 | 37.7503 | 15.0818 | 0.6  | 2.5 | 6  | 94  | 0.19 | 1    | 0.6   |
| 1984/10/26 11:45:04 | 37.7817 | 15.0433 | 6.0  | 1.8 | 5  | 200 | 0.11 | 2.1  | 3.1   |
| 1984/10/26 11:45:39 | 37.6660 | 15.1032 | 0.8  | 2.1 | 8  | 221 | 0.33 | 2.7  | 1.5   |
| 1984/10/26 12:15:37 | 37.7052 | 15.1138 | 9.1  | 1.8 | 6  | 131 | 0.12 | 1.9  | 2.8   |
| 1984/10/26 12:31:49 | 37.7517 | 15.0913 | 11.1 | 1.9 | 6  | 85  | 0.29 | 4.3  | 9.8   |
| 1984/10/26 13:05:11 | 37.7363 | 15.1330 | 15.2 | 1.8 | 5  | 220 | 0.23 | 16.5 | 24.5  |
| 1984/10/26 13:20:34 | 37.7448 | 15.0982 | 10.5 | 2.5 | 10 | 100 | 0.24 | 1.8  | 3     |
| 1984/10/26 13:54:07 | 37.7428 | 15.0830 | 2.4  | 2.4 | 11 | 83  | 0.24 | 0.9  | 0.5   |
| 1984/10/26 16:00:53 | 37.7360 | 15.0735 | 8.0  | 2.8 | 11 | 81  | 0.36 | 2    | 3.7   |
| 1984/10/26 16:04:52 | 37.6820 | 15.0990 | 6.2  | 2.6 | 11 | 190 | 0.3  | 2.6  | 3.4   |
| 1984/10/26 16:20:29 | 37.7397 | 15.0600 | 6.1  | 2.1 | 7  | 95  | 0.23 | 1.6  | 3.1   |
| 1984/10/26 17:08:38 | 37.7470 | 15.0745 | 4.6  | 3   | 8  | 99  | 0.22 | 1.3  | 6.5   |
| 1984/10/26 17:29:47 | 37.6480 | 15.1368 | 4.6  | 2.3 | 5  | 288 | 0.09 | 5.9  | 5     |
| 1984/10/26 18:16:08 | 37.7037 | 15.0865 | 2.1  | 2.8 | 6  | 101 | 0.22 | 2.1  | 1.8   |
| 1984/10/26 21:31:01 | 37.7620 | 15.0423 | 10.7 | 3.5 | 7  | 106 | 0.22 | 1.5  | 3.1   |
| 1984/10/26 21:36:27 | 37.7970 | 15.1012 | 17.1 | 3.2 | 5  | 153 | 0.28 | 6.3  | 8.9   |
| 1984/10/26 22:39:50 | 37.8092 | 14.9887 | 14.7 | 2.6 | 5  | 137 | 0.65 | 9.9  | 6.2   |
| 1984/10/26 22:41:42 | 37.7920 | 15.0742 | 7.9  | 3   | 5  | 130 | 0.09 | 1.1  | 3.6   |
| 1984/10/27 00:15:20 | 37.7768 | 15.0828 | 0.4  | 1.8 | 5  | 136 | 0.08 | 1    | 0.9   |
| 1984/10/27 00:48:29 | 37.7622 | 15.0497 | 0.9  | 2.5 | 7  | 110 | 0.21 | 1.3  | 1.2   |
| 1984/10/27 01:21:43 | 37.7585 | 15.0525 | 11.2 | 2.6 | 8  | 67  | 0.26 | 2    | 4.8   |
| 1984/10/27 01:39:31 | 37.7457 | 15.0775 | 8.1  | 1.6 | 5  | 145 | 0.1  | 2.2  | 4.5   |
| 1984/10/27 01:43:30 | 37.7412 | 15.0818 | 7.8  | 1.8 | 5  | 125 | 0.03 | 0.6  | 1.4   |
| 1984/10/27 01:57:19 | 37.7407 | 15.0782 | 10.6 | 2.9 | 11 | 79  | 0.21 | 1.2  | 1.8   |
| 1984/10/27 02:31:33 | 37.7533 | 15.0987 | 7.1  | 2   | 7  | 144 | 0.24 | 2.1  | 3.1   |
| 1984/10/27 02:35:29 | 37.7657 | 15.0790 | 1.2  | 2.5 | 6  | 131 | 0.1  | 0.8  | 0.7   |
| 1984/10/27 02:40:49 | 37.7617 | 15.0573 | 1.3  | 2.4 | 5  | 146 | 0.01 | 0.2  | 0.1   |
| 1984/10/27 03:29:54 | 37.7305 | 15.0583 | 4.6  | 2   | 5  | 175 | 0.07 | 1.1  | 2.7   |
| 1984/10/27 03:41:23 | 37.6885 | 15.0745 | 2.5  | 1.8 | 5  | 181 | 0.19 | 2.2  | 1     |
| 1984/10/27 03:49:36 | 37.7595 | 15.0477 | 6.6  | 2.1 | 9  | 60  | 0.22 | 1.2  | 2.8   |

|                     |         |         |      |     |    |     |      |      |       |
|---------------------|---------|---------|------|-----|----|-----|------|------|-------|
| 1984/10/27 03:55:25 | 37.7528 | 15.0458 | 10.6 | 1.9 | 7  | 98  | 0.21 | 1.9  | 4.1   |
| 1984/10/27 04:21:21 | 37.7617 | 15.1198 | 8.4  | 2   | 6  | 113 | 0.08 | 1.1  | 1.4   |
| 1984/10/27 06:17:28 | 37.7645 | 15.0472 | 0.6  | 2.2 | 9  | 60  | 0.32 | 1.4  | 1.4   |
| 1984/10/27 06:17:56 | 37.7617 | 15.0348 | 9.1  | 3.1 | 11 | 56  | 0.34 | 1.6  | 3     |
| 1984/10/27 07:39:09 | 37.7857 | 15.0892 | 16.8 | 2   | 5  | 142 | 0.35 | 6    | 15.5  |
| 1984/10/27 07:47:06 | 37.7695 | 15.0438 | 0.9  | 2.6 | 6  | 108 | 0.13 | 1    | 0.9   |
| 1984/10/27 09:15:45 | 37.7732 | 15.0507 | 2.7  | 2.7 | 5  | 112 | 0.11 | 1.2  | 249   |
| 1984/10/27 10:20:31 | 37.7753 | 15.0687 | 2.2  | 2.8 | 7  | 125 | 0.24 | 1.6  | 14.2  |
| 1984/10/27 10:33:53 | 37.7608 | 15.0700 | 8.9  | 2   | 5  | 136 | 0.17 | 9.3  | 35.9  |
| 1984/10/27 10:43:13 | 37.7380 | 15.0828 | 11.0 | 2.6 | 6  | 125 | 0.12 | 1.8  | 4.5   |
| 1984/10/27 10:47:21 | 37.7540 | 15.1135 | 5.6  | 1.8 | 6  | 158 | 0.07 | 0.7  | 1.1   |
| 1984/10/27 11:10:41 | 37.7532 | 15.0345 | 12.1 | 3   | 8  | 88  | 0.15 | 1.1  | 2.4   |
| 1984/10/27 11:39:19 | 37.7608 | 15.0392 | 10.8 | 2.5 | 8  | 115 | 0.19 | 1.5  | 3.8   |
| 1984/10/27 12:37:12 | 37.7595 | 15.0557 | 8.3  | 2.6 | 12 | 80  | 0.26 | 1.3  | 2.6   |
| 1984/10/27 12:53:40 | 37.6675 | 15.1030 | 4.8  | 1.8 | 5  | 227 | 0.05 | 1.1  | 1.5   |
| 1984/10/27 13:10:12 | 37.7510 | 15.0323 | 6.8  | 1.5 | 5  | 117 | 0.12 | 2.5  | 5.3   |
| 1984/10/27 13:40:15 | 37.7443 | 15.0765 | 10.0 | 2.2 | 6  | 89  | 0.24 | 3.3  | 8.1   |
| 1984/10/27 14:04:11 | 37.7493 | 15.0792 | 3.4  | 2   | 6  | 127 | 0.12 | 0.9  | 204.9 |
| 1984/10/27 14:32:27 | 37.7572 | 14.9935 | 9.8  | 2   | 5  | 183 | 0.43 | 1    | 3.1   |
| 1984/10/27 14:39:38 | 37.7583 | 15.1347 | 12.5 | 2.4 | 6  | 180 | 0.09 | 1.8  | 2.9   |
| 1984/10/27 14:46:06 | 37.7313 | 15.1083 | 12.2 | 2.8 | 10 | 122 | 0.24 | 2.4  | 3.7   |
| 1984/10/27 14:57:21 | 37.7355 | 15.0377 | 19.7 | 1.8 | 5  | 110 | 0.09 | 8.6  | 21.3  |
| 1984/10/27 15:21:21 | 37.8427 | 14.7497 | 54.4 | 2.6 | 11 | 250 | 0.59 | 24.9 | 52.1  |
| 1984/10/27 15:48:19 | 37.7132 | 15.0823 | 4.5  | 1.9 | 5  | 127 | 0    | 0    | 0     |
| 1984/10/27 16:16:51 | 37.8122 | 14.9553 | 15.7 | 2.2 | 5  | 144 | 0.03 | 0.6  | 2.6   |
| 1984/10/27 16:37:37 | 37.7622 | 15.0010 | 15.9 | 1.8 | 6  | 122 | 0.51 | 7.5  | 37.1  |
| 1984/10/27 17:15:55 | 37.7740 | 15.0108 | 1.8  | 1.8 | 10 | 70  | 0.45 | 2    | 1.8   |
| 1984/10/27 18:21:38 | 37.7513 | 15.0497 | 0.0  | 2.1 | 6  | 107 | 0.19 | 1    | 1.1   |
| 1984/10/27 18:22:58 | 37.7940 | 15.0795 | 5.0  | 2   | 5  | 199 | 0.24 | 7.1  | 88.7  |
| 1984/10/27 18:25:03 | 37.7630 | 15.1058 | 3.6  | 2.4 | 6  | 153 | 0.19 | 1.6  | 333.8 |
| 1984/10/27 23:28:14 | 37.7758 | 15.1445 | 9.0  | 2   | 6  | 191 | 0.32 | 6.6  | 18.8  |
| 1984/10/27 23:48:59 | 37.7507 | 15.0710 | 6.4  | 2.9 | 8  | 121 | 0.18 | 1.1  | 3.2   |
| 1984/10/28 00:41:29 | 37.7717 | 14.7597 | 9.7  | 2.6 | 8  | 225 | 0.85 | 6.9  | 14    |
| 1984/10/28 01:05:06 | 37.7517 | 15.0583 | 6.0  | 2.9 | 12 | 65  | 0.18 | 0.8  | 1.5   |
| 1984/10/28 01:22:31 | 37.7102 | 15.0970 | 6.3  | 2   | 5  | 119 | 0    | 0    | 0.1   |
| 1984/10/28 01:37:38 | 37.7465 | 15.1042 | 8.4  | 2.4 | 12 | 108 | 0.17 | 1    | 1.6   |
| 1984/10/28 01:44:09 | 37.7925 | 15.0545 | 2.2  | 3.5 | 11 | 150 | 0.22 | 1.1  | 0.7   |
| 1984/10/28 01:55:37 | 37.7592 | 15.1513 | 9.1  | 2.3 | 7  | 197 | 0.25 | 3.2  | 3.9   |
| 1984/10/28 03:45:41 | 37.7470 | 15.0283 | 10.9 | 2.1 | 5  | 150 | 0.06 | 1.2  | 3.5   |
| 1984/10/28 04:41:18 | 37.6698 | 15.2070 | 0.5  | 1.9 | 5  | 295 | 0.33 | 21.6 | 11.4  |
| 1984/10/28 05:42:28 | 37.9110 | 14.9452 | 5.0  | 2.3 | 6  | 279 | 0.61 | 37.2 | 177.5 |
| 1984/10/28 06:39:36 | 37.7973 | 15.0277 | 0.4  | 1.8 | 5  | 218 | 0.09 | 0.9  | 0.7   |
| 1984/10/28 07:35:51 | 37.7662 | 15.0542 | 7.6  | 2.1 | 9  | 63  | 0.32 | 1.9  | 4.2   |
| 1984/10/28 07:45:08 | 37.7887 | 14.9527 | 1.1  | 2.3 | 8  | 73  | 0.37 | 2.1  | 1.9   |
| 1984/10/28 12:51:16 | 37.7327 | 15.0798 | 3.4  | 2.1 | 7  | 108 | 0.24 | 1.3  | 1.1   |
| 1984/10/28 13:11:28 | 37.7558 | 15.0812 | 8.0  | 2.2 | 5  | 130 | 0.06 | 0.9  | 1.3   |
| 1984/10/28 13:23:31 | 37.7595 | 15.0832 | 2.4  | 1.8 | 6  | 153 | 0.15 | 1    | 0.4   |
| 1984/10/28 14:16:40 | 37.7587 | 15.0467 | 7.8  | 2   | 5  | 198 | 0.02 | 0.4  | 0.5   |
| 1984/10/28 14:31:30 | 37.7475 | 15.0563 | 1.9  | 2.2 | 9  | 92  | 0.43 | 1.8  | 1.2   |
| 1984/10/28 15:17:42 | 37.7823 | 15.0435 | 4.1  | 3   | 13 | 70  | 0.49 | 1.8  | 11.1  |

|                     |         |         |      |     |   |     |      |       |       |
|---------------------|---------|---------|------|-----|---|-----|------|-------|-------|
| 1984/10/29 00:19:15 | 37.7813 | 15.1100 | 3.7  | 2.1 | 6 | 123 | 0.22 | 2     | 4.7   |
| 1984/10/29 00:20:17 | 37.7678 | 15.1180 | 11.2 | 1.9 | 5 | 86  | 0.07 | 1.5   | 2.7   |
| 1984/10/29 00:21:51 | 37.7688 | 15.0220 | 1.2  | 1.6 | 7 | 88  | 0.23 | 0.9   | 9.4   |
| 1984/10/29 00:24:13 | 37.7808 | 15.0625 | 0.0  | 2.6 | 5 | 99  | 0.34 | 2.1   | 2     |
| 1984/10/29 02:01:17 | 37.7108 | 14.9682 | 16.2 | 2.1 | 5 | 161 | 0.03 | 1.2   | 1.4   |
| 1984/10/29 03:04:20 | 37.7380 | 15.0397 | 1.2  | 1.7 | 5 | 137 | 0.21 | 2.2   | 1.9   |
| 1984/10/29 03:14:20 | 37.6495 | 15.0980 | 1.0  | 1.9 | 5 | 290 | 0.2  | 13.5  | 6     |
| 1984/10/29 03:27:56 | 37.7508 | 15.1033 | 0.0  | 2.7 | 7 | 128 | 0.6  | 1.7   | 1.5   |
| 1984/10/29 13:16:20 | 37.7385 | 15.1040 | 11.9 | 2.3 | 5 | 113 | 0.02 | 0.3   | 0.5   |
| 1984/10/29 13:21:09 | 37.7450 | 15.1132 | 8.9  | 2.4 | 7 | 126 | 0.13 | 1.6   | 2.7   |
| 1984/10/29 13:22:40 | 37.7198 | 15.1115 | 2.8  | 2.5 | 5 | 125 | 0.24 | 1.3   | 2     |
| 1984/10/29 14:39:05 | 37.7447 | 15.1068 | 2.0  | 2.3 | 5 | 149 | 0.42 | 4     | 43.9  |
| 1984/10/29 14:58:09 | 37.6622 | 15.0022 | 2.3  | 0   | 5 | 225 | 0.38 | 8.5   | 46.9  |
| 1984/10/29 15:37:13 | 37.7410 | 15.1202 | 8.1  | 2.7 | 8 | 144 | 0.16 | 1.4   | 2     |
| 1984/10/29 16:04:54 | 37.7260 | 14.9625 | 9.6  | 3.2 | 8 | 66  | 0.15 | 1.9   | 3.9   |
| 1984/10/29 16:53:44 | 37.7525 | 15.0600 | 9.9  | 1.8 | 8 | 73  | 0.3  | 2.3   | 4.8   |
| 1984/10/29 21:11:48 | 37.7740 | 15.0748 | 5.0  | 2.4 | 5 | 129 | 0.24 | 18    | 361.3 |
| 1984/10/29 23:32:18 | 37.6603 | 15.1227 | 9.5  | 1.6 | 5 | 256 | 0.15 | 6.8   | 6.8   |
| 1984/10/29 23:58:32 | 37.7568 | 15.0400 | 9.9  | 2.4 | 7 | 99  | 0.21 | 1.8   | 4.1   |
| 1984/10/30 00:32:50 | 37.7490 | 15.0660 | 4.9  | 2.1 | 5 | 116 | 0.06 | 0.7   | 1.1   |
| 1984/10/30 10:48:46 | 37.7270 | 15.1107 | 7.3  | 1.9 | 5 | 240 | 0.46 | 15    | 11.2  |
| 1984/10/30 13:37:18 | 37.7592 | 15.0530 | 9.2  | 2.1 | 5 | 128 | 0.06 | 1.3   | 2.5   |
| 1984/10/30 14:02:50 | 37.6075 | 15.3015 | 20.3 | 0   | 7 | 316 | 0.16 | 23.7  | 9.5   |
| 1984/10/30 14:40:30 | 37.8580 | 15.0387 | 5.0  | 1.5 | 8 | 131 | 0.31 | 3.8   | 30.6  |
| 1984/10/30 20:06:39 | 37.4450 | 15.5297 | 0.1  | 0   | 7 | 333 | 0.4  | 104.9 | 194.5 |
| 1984/10/30 20:32:28 | 37.7667 | 15.0770 | 7.2  | 1.5 | 5 | 139 | 0.17 | 4.4   | 4.8   |
| 1984/10/30 20:48:30 | 37.7468 | 15.0307 | 15.8 | 2.2 | 5 | 148 | 0.17 | 5.8   | 14.9  |
| 1984/10/30 23:50:25 | 37.8775 | 14.9973 | 13.6 | 2.5 | 5 | 150 | 0.4  | 7.2   | 19.4  |
| 1984/10/31 00:58:54 | 37.6540 | 15.3948 | 10.4 | 0   | 5 | 321 | 0.19 | 58.5  | 13.6  |
| 1984/10/31 03:00:30 | 37.7607 | 15.0213 | 5.8  | 2   | 6 | 116 | 0.09 | 0.9   | 3.2   |
| 1984/10/31 04:27:54 | 37.7692 | 15.0882 | 3.4  | 1.5 | 7 | 117 | 0.84 | 6.5   | 4.7   |
| 1984/10/31 05:28:03 | 37.8477 | 15.0863 | 5.0  | 2.5 | 6 | 117 | 0.58 | 17    | 69    |
| 1984/10/31 10:48:33 | 37.7268 | 14.9680 | 1.9  | 1.7 | 5 | 184 | 0.85 | 15.3  | 12.7  |
| 1984/10/31 11:40:49 | 37.8222 | 15.0103 | 0.8  | 1.9 | 7 | 89  | 0.43 | 2.6   | 651.9 |
| 1984/10/31 18:07:23 | 37.4038 | 16.0945 | 5.0  | 0   | 6 | 345 | 0.54 | 611.7 | 620.1 |
| 1984/10/31 18:10:38 | 37.7077 | 15.1680 | 0.3  | 2.3 | 5 | 276 | 0.29 | 12.7  | 643.1 |
